# Supplementary material for: Mindfulness-based retreat for mothers of paediatric heart transplant recipients: protocol for a pilot intervention study
Source: PubMed Central journal article supplement — BMJ Open. 2022 Jul 8;12(7):e060461. doi: 10.1136/bmjopen-2021-060461 (PMC9272107; doi:10.1136/bmjopen-2021-060461), 2022-07-08
Supplement: bmjopen-2021-060461.draft_revisions.pdf [file bmjopen-2021-060461.draft_revisions.pdf]

# BMJ Open

BMJ Open is committed to open peer review. As part of this commitment we make the peer review history of every article we publish publicly available.

When an article is published we post the peer reviewers' comments and the authors' responses online. We also post the versions of the paper that were used during peer review. These are the versions that the peer review comments apply to.

The versions of the paper that follow are the versions that were submitted during the peer review process. They are not the versions of record or the final published versions. They should not be cited or distributed as the published version of this manuscript.

BMJ Open is an open access journal and the full, final, typeset and author-corrected version of record of the manuscript is available on our site with no access controls, subscription charges or pay-per-view fees (<http://bmjopen.bmj.com>).

If you have any questions on BMJ Open's open peer review process please email [info.bmjopen@bmj.com](mailto:info.bmjopen@bmj.com)

# BMJ Open

## Mindfulness-based retreat for mothers of paediatric heart transplant recipients: A pilot intervention study protocol

|                               |                                                                                                                                                                                                                                                                                                                                                                                                                                                                                                                                 |
|-------------------------------|---------------------------------------------------------------------------------------------------------------------------------------------------------------------------------------------------------------------------------------------------------------------------------------------------------------------------------------------------------------------------------------------------------------------------------------------------------------------------------------------------------------------------------|
| Journal:                      | <i>BMJ Open</i>                                                                                                                                                                                                                                                                                                                                                                                                                                                                                                                 |
| Manuscript ID                 | bmjopen-2021-060461                                                                                                                                                                                                                                                                                                                                                                                                                                                                                                             |
| Article Type:                 | Protocol                                                                                                                                                                                                                                                                                                                                                                                                                                                                                                                        |
| Date Submitted by the Author: | 21-Dec-2021                                                                                                                                                                                                                                                                                                                                                                                                                                                                                                                     |
| Complete List of Authors:     | Robertson, Taylor; The Hospital for Sick Children, Social Work<br>Ahola Kohut, Sara; Hospital for Sick Children, Department of Gastroenterology, Hepatology and Nutrition; University of Toronto, Psychiatry<br>Telfer, Heather; SickKids, Social Work; SickKids, Transplant and Regenerative Medicine Centre<br>Seifert-Hansen, Mirna; SickKids, Transplant and Regenerative Medicine Centre<br>Mitchell, Joanna; Canadian Donation and Transplantation Research Program<br>Anthony, Samantha; The Hospital for Sick Children, |
| Keywords:                     | Quality in health care < HEALTH SERVICES ADMINISTRATION & MANAGEMENT, Transplant medicine < INTERNAL MEDICINE, MENTAL HEALTH, PAEDIATRICS, Paediatric transplant surgery < PAEDIATRIC SURGERY, QUALITATIVE RESEARCH                                                                                                                                                                                                                                                                                                             |
|                               |                                                                                                                                                                                                                                                                                                                                                                                                                                                                                                                                 |

SCHOLARONE™  
Manuscripts

## Mindfulness-based retreat for mothers of paediatric heart transplant recipients: A pilot intervention study protocol

Taylor Robertson<sup>1</sup>, Sara Ahola Kohut<sup>2,3,4</sup>, Heather Telfer<sup>1,5</sup>, Mirna Seifert-Hansen<sup>5</sup>, Joanna Mitchell<sup>6</sup>, Samantha J. Anthony<sup>1,4,5,6,7</sup>

1. Department of Social Work, The Hospital for Sick Children, Toronto, ON, Canada
2. Department of Psychology, The Hospital for Sick Children, Toronto, ON, Canada
3. Department of Psychiatry, University of Toronto, ON, Canada
4. Child Health Evaluative Sciences, Peter Gilgan Centre for Research and Learning, Toronto, ON, Canada
5. Transplant and Regenerative Medicine Centre, The Hospital for Sick Children, Toronto, ON, Canada
6. Canadian Donation and Transplantation Research Program, Edmonton, AB, Canada
7. Factor-Inwentash Faculty of Social Work, University of Toronto, Toronto, ON, Canada

Corresponding author:

Samantha J. Anthony

The Hospital for Sick Children

686 Bay Street, Toronto, Ontario, M5G 0A4

E-mail: [samantha.anthony@sickkids.ca](mailto:samantha.anthony@sickkids.ca)

Word count: 2970

| Author                  | ORCID-ID            |
|-------------------------|---------------------|
| Taylor Robertson        | 0000-0002-2690-701X |
| Dr. Sara Ahola Kohut    | 0000-0003-1562-947X |
| Dr. Samantha J. Anthony | 0000-0002-1800-2333 |

## Abstract

**Introduction:** Mothers are often the primary caregivers for children requiring heart transplantation. Given that a mother's ability to successfully cope with the demands of her caregiving role may be predictive of positive familial psychosocial outcomes, it is critical that maternal coping is assessed and supported in paediatric health care. Mindfulness-based programs are proposed as one intervention that may enhance quality of life, improve distress tolerance and coping, and reduce social isolation in caregiving populations. This pilot study aims to investigate: (1) the implementation success of a mindfulness-based retreat (MBR), and (2) the effectiveness of the MBR at improving quality of life, distress tolerance, coping and perceived social support for mothers of paediatric heart transplant recipients.

**Methods and Analysis:** A convergent parallel, mixed method design is proposed for this pilot study. Quantitative data will be obtained using five standardized instruments completed at three time points: (T1) 24-hours prior to the intervention, (T2) immediately upon completion of the intervention, and (T3) three months post-intervention. Qualitative data will be collected from all participants both through semi-structured focus groups at T2 and individual telephone interviews at T3. Focus groups and individual interviews will be transcribed verbatim for thematic analysis. Quantitative and qualitative data will be merged and compared during interpretation to ensure that the intervention implementation and effectiveness of the MBR retreat are described with comprehensive accuracy.

**Ethics and Dissemination:** This research study received Institutional Research Ethics Board approval from The Hospital for Sick Children. Informed consent will be obtained prior to participants' study enrollment. This research addresses the quality of life and well-being of

1  
2  
3 mothers of paediatric heart transplant recipients and will inform a future randomized clinical trial  
4  
5 to assess implementation outcomes and intervention effectiveness of MBRs within this  
6  
7 population.  
8  
9

### 10 11 **Article Summary – Strengths and Limitations** 12

- 13  
14  
15 • This pilot study will be the first mindfulness intervention to specifically target the  
16  
17 psychosocial needs of mothers of paediatric heart transplant recipients through an acute  
18  
19 retreat-based mindfulness intervention.  
20
- 21  
22 • Results of this study will significantly increase the breadth of knowledge on interventions  
23  
24 that may effectively support primary caregivers of paediatric heart transplant recipients  
25  
26 and will inform a future randomized clinical trial.  
27
- 28  
29 • This is a single-centre study with a proposed small sample which may limit  
30  
31 generalizability of findings.  
32

33  
34 **Keywords:** quality in health care, transplant medicine, mental health, paediatrics, paediatric  
35  
36 transplant surgery, qualitative research  
37  
38  
39  
40  
41  
42  
43  
44  
45  
46  
47  
48  
49  
50  
51  
52  
53  
54  
55  
56  
57  
58  
59  
60

## INTRODUCTION

From the time of diagnosis, caring for a child with a chronic illness is often a source of persistent stress for a family system.[1-4] Within paediatric heart transplantation, recipients face life-long medical follow-up that includes regular clinic visits, frequent, often invasive, medical tests and procedures, and immunosuppressive drug therapy with many accompanying side-effects (e.g., high blood pressure, kidney dysfunction, growth delay, infection risks, possible malignancies, and cosmetic effects).[5,6,7] This strict care regimen is disruptive to a family's daily life, and places chronic social, psychological, and financial strain on family systems.[3,7]

### **Maternal Caregiving Impact in Paediatric Heart Transplant**

Mothers are most commonly the primary caregivers for paediatric heart transplant recipients.[5] As such, mothers' quality of life is impacted more than any other family member, by the mounting demands and parenting stressors associated with a child's illness.[5] Previous research on maternal coping in paediatric heart transplantation demonstrates clinically significant levels of psychosocial risk for poor mental health outcomes in 40% of respondents.[3] Additionally, the elevated psychosocial risk and significant emotional impact of transplantation on mothers appears to be enduring,[8,9] with high levels of caregiver burden reported several years post-transplantation.[8] Recent studies have cited the experience of paediatric transplantation as an ongoing source of trauma for parents.[7,10] In a study on parents of heart transplant recipients, (75% of which were mothers), 19% of participants were found to meet the Diagnostic and Statistical Manual – IV diagnostic criteria for post-traumatic stress disorder (PTSD), amounting to a prevalence rate that is two and half times higher than the general population.[7] Untreated symptoms of PTSD are commonly felt within the wider family

1  
2  
3 system as they directly impact parenting capacity, and consequently, child health and  
4  
5 development, well-being, and adjustment.[11,12]  
6

7  
8 Increased clinical attention and accessible interventions to support the emotional coping  
9  
10 and well-being of mothers may be efficacious to increase maternal coping and instrumental to  
11  
12 support paediatric heart transplant recipients' health and well-being. The psychosocial needs of  
13  
14 mothers of children with chronic illness are consistently underserved across healthcare  
15  
16 settings.[1] Evidence-based interventions to support caregivers in paediatric healthcare are  
17  
18 scarce and not prioritized,[13] and existing interventions (e.g., weekly support groups and  
19  
20 individual counseling) are time-consuming which parents have cited as their primary barrier to  
21  
22 participation in such health interventions.[1] To our knowledge this pilot study will be the first  
23  
24 of its kind to specifically target the psychosocial needs of mothers of paediatric heart transplant  
25  
26 recipients through an acute retreat-based mindfulness intervention.  
27  
28  
29

### 30 31 **Mindfulness-Based Interventions**

32  
33 There is empirical evidence that Mindfulness Based Interventions (MBI) significantly  
34  
35 reduce psychological distress, anxiety, and depressive symptoms, and improve physical and  
36  
37 mental health across many populations.[14,15] Mindfulness-Based Stress Reduction is  
38  
39 currently the most widely recognized and utilized MBI for the treatment of PTSD and general  
40  
41 stress management.[16-18] MBIs more broadly have been shown to improve mental and  
42  
43 physical health in populations of caregivers for children with chronic illnesses.[19,20] MBIs  
44  
45 are structured programs that incorporate tenets of mindful meditation and assume that the  
46  
47 cultivation of compassionate and non-judgmental awareness will lead to a reduction in stress,  
48  
49 suffering and symptoms of mental illness.[16-18] In MBIs, participants are guided through  
50  
51 exercises that develop mindfulness skills through formal practice.[14,15] These supported  
52  
53  
54  
55  
56  
57  
58  
59  
60

1  
2  
3 opportunities to build capacity practicing mindfulness skills increase the likelihood for post-  
4 intervention use of these skills as reliable coping tools to minimize distress in everyday  
5 life.[14,15]  
6  
7

8  
9  
10 This study proposes a novel, two-day mindfulness-based weekend retreat adapted for  
11 mothers of paediatric heart transplant recipients. It is recognized that an increased level of  
12 social support is derived from the shared experience of MBIs when offered in a retreat  
13 format.[14,19] This may provide benefit to the target population of this study as high  
14 prevalence of social isolation has been identified amongst mothers of heart transplant  
15 recipients, as well as their shared interest to connect with other mothers in similar positions.[5]  
16 MBIs facilitated through a mindfulness-based weekend retreat (MBR) increase the opportunity  
17 for social connection amongst participants because of environmental facilitators such as shared  
18 accommodations, meal times and free time. Mindfulness is ideally suited for this population to  
19 address the inherent stress they experience through their caregiving roles,[7] and group  
20 mindfulness practice has the ability to catalyze community building that is sustained beyond a  
21 research setting.[21] Given the applicability of a MBR to meet the needs of mothers of  
22 paediatric heart transplant recipients it is proposed within this pilot study as an intervention  
23 with potential to enhance maternal well-being through the development of coping skills, social  
24 connectedness, and psychological health.[5,14,16,19,20]  
25  
26  
27  
28  
29  
30  
31  
32  
33  
34  
35  
36  
37  
38  
39  
40  
41  
42  
43

#### 44 **Study Aims**

45  
46  
47 To investigate the feasibility and efficacy of this intervention the research objectives of  
48 this pilot study are to: (1) examine implementation outcomes (*i.e., appropriateness,*  
49 *acceptability, adoption, feasibility, fidelity*)[22] of the MBR, and (2) to assess the efficacy of the  
50 MBR on maternal quality of life, distress tolerance, coping and perceived social support. This is  
51  
52  
53  
54  
55  
56  
57  
58  
59  
60



1  
2  
3 a pilot study and application of the results from this research will inform the study design of a  
4  
5 future randomized clinical trial.  
6

## 7 8 **METHODS AND ANALYSIS**

### 9 10 **Study Design**

11  
12 A convergent parallel, mixed method design was chosen for this pilot study wherein  
13  
14 quantitative and qualitative data will be collected simultaneously and analyzed independently,  
15  
16 with results merged during the final interpretative phase to address the study's overall  
17  
18 purpose.[22] This mixed methods design will allow for a comprehensive understanding of the  
19  
20 study phenomena by incorporating both qualitative description methods to gather a rich account  
21  
22 of participant experiences as well as quantitative measures to document the potential changes in  
23  
24 participant coping styles, distress tolerance, perceived quality of life and social support.[23] The  
25  
26 participant sample size will be equal across both quantitative and qualitative arms of data  
27  
28 collection.  
29  
30  
31

32  
33 Qualitative research is highly valuable in this area because of the subjective impact of a  
34  
35 child's illness on a family, and the individualized nature of each mother's parenting experience  
36  
37 through transplantation. Qualitative data will be gathered through participation in a focus group  
38  
39 on the final day of the retreat and an individual interview three months post-retreat. Focus groups  
40  
41 are an efficient and effective method of qualitative data collection to yield anecdotal information  
42  
43 about personal experiences and perceptions.[24,25] Group dialogue with mothers about their  
44  
45 experiences of the retreat will offer a reflective opportunity to gather participant insights and to  
46  
47 address implementation outcomes (*i.e., appropriateness, acceptability, adoption, feasibility,*  
48  
49 *fidelity*)[26] of this intervention for this clinical population. A focus group fits well with the  
50  
51 group model of this retreat and is an opportune and feasible way to collect qualitative data from  
52  
53  
54  
55  
56  
57  
58  
59  
60

1  
2  
3 this particular sample, given their geographic diversity. Both the focus group and interview will  
4  
5 gather participant feedback of parallel variables.  
6

7  
8 The quantitative instruments selected (*Coping Health Inventory for Parents*, *Five Facet*  
9  
10 *Mindfulness Questionnaire*, *Pediatric Quality of Life (PedsQL™)*, *Distress Tolerance Scale*,  
11  
12 *Multidimensional Scale of Perceived Social Support*) will capture a measurable and  
13  
14 generalizable assessment of maternal coping. The focus group and individual interview will  
15  
16 highlight detailed and individualized perspectives of the mothering experience through paediatric  
17  
18 heart transplantation, as well as provide insights to the participant experience of the MBR.  
19  
20 Integration of the qualitative and quantitative data will highlight a depth of understanding that  
21  
22 could not be obtained by either data separately.  
23  
24

### 25 26 **Patient and Public Involvement**

27  
28 Caregiver needs and perspectives have been prioritized throughout the MBR pilot study  
29  
30 design. At the project's inception, a mother of a pediatric heart transplant recipient was recruited  
31  
32 to be a member of the research team as a patient partner (JM). Her lived caregiving experience  
33  
34 informed many decisions concerning intervention design as well as methodological choices for  
35  
36 outcome measures. The data collection measures identified dually prioritize the need to gather  
37  
38 the richest possible data set, with a commitment to refrain from burdening participants with  
39  
40 lengthy and arduous measures in consideration of their time.  
41  
42  
43

### 44 45 **Intervention Design**

46  
47 The intervention will be a two-day retreat held over a weekend. The MBR will be held  
48  
49 at a resort in northern Ontario, Canada and will consist of a structured schedule of mindfulness  
50  
51 and compassion-based teaching and practices, including formal meditation, circle sharing, and  
52  
53  
54  
55  
56  
57  
58  
59  
60

1  
2  
3  
4 deep relaxation.[27] The competencies developed in these exercises will be incorporated into  
5  
6  
7 all other retreat activities such as mealtimes, mindful movement (including yoga), and walking  
8  
9  
10 meditations. Mindfulness talks will be held on each day of the retreat, offering opportunities  
11  
12  
13 for participants to learn about and develop mindfulness skills. Each mindfulness talk in the  
14  
15  
16 retreat series will build upon the content of the previous talk, with the goal of moving  
17  
18  
19 participants from introspective personal mindfulness practice to interpersonal community  
20  
21  
22 building. Opportunities for guided circle sharing (i.e., group practice of mindfulness and  
23  
24  
25 interpersonal sharing) and deep relaxation (i.e., personal practice bringing mindful attention to  
26  
27  
28 the body to relieve stress) will be integrated throughout the retreat.  
29  
30  
31

32  
33  
34 The MBR will have two primary facilitators who are both mental health professionals  
35  
36  
37 (social worker and psychologist) with longstanding personal mindfulness practices. In  
38  
39  
40 addition, both facilitators have completed teacher training in mindfulness (Mindful Self-  
41  
42  
43 Compassion and Mindfulness-Based Cognitive Therapy), as well as certificates in both  
44  
45  
46 Foundations of Applied Mindfulness Meditation and Applied Specialization in Mindfulness  
47  
48  
49 Meditation from the University of Toronto, Canada. Lastly, both facilitators have extensive  
50  
51  
52  
53  
54 experience practicing in tertiary care hospitals adapting MBIs to support caregivers in chronic  
55  
56  
57  
58  
59  
60

1  
2  
3  
4 disease populations. The facilitators, alongside the research team's patient partner (JM),  
5  
6  
7 adapted the MBR specifically to the paediatric heart transplantation context.  
8  
9

## 10 **Sample Recruitment**

11  
12 A total of 20 participants will be recruited from The Hospital for Sick Children  
13  
14 (SickKids) Labatt Family Heart Centre who meet the following criteria: (1) a mother residing in  
15  
16 Ontario who is the primary caregiver of a paediatric heart transplant recipient, who is (2) a  
17  
18 minimum of four months post-transplant. Within this study, '*mother*' is defined as a female-  
19  
20 identifying caregiver to a paediatric heart transplant recipient. Participants are not required to be  
21  
22 biologically related to the heart transplant recipient but must be the primary female-identifying  
23  
24 caregiver and share residence with the child. Purposive sampling will be used to obtain a sample  
25  
26 with maximum variation.[28] Purposive sampling will ensure (1) demographic variation amongst  
27  
28 participants, specifically regarding: the mother's age, their child's age, stage of development and  
29  
30 gender, and the family's race, ethnicity, composition, and geographic location of residence, and  
31  
32 (2) that any mother selected to participate is coping well enough at baseline so as not to be  
33  
34 overburdened by participation in the study. Due to resource limitations that prohibit access to  
35  
36 language and accessibility services, non-English speaking mothers and those with severe  
37  
38 cognitive impairment as determined by a mental health professional will be excluded from  
39  
40 participation in this study. Limited resources have also resulted in the restriction for participation  
41  
42 in this study to Ontario residents only.  
43  
44  
45  
46  
47  
48

49 Participant recruitment began in January 2020 and is ongoing. The retreat will be hosted  
50  
51 when it is safe to do so according to local COVID-19 public health guidelines. Participant  
52  
53 recruitment has involved social work and nursing staff from the Heart Transplant Program at the  
54  
55 SickKids Labatt Family Heart Centre, who each received a study description from the research  
56  
57  
58  
59  
60

1  
2  
3 team and were asked to select and refer mothers for eligibility review. The recruitment request  
4 stipulated that each participant must be referred by the social worker or nurse, with whom they  
5 have a pre-existing clinical relationship. This ensured that a baseline assessment of coping was  
6 included in the referral, to confirm that study participation would not overburden the mother. If  
7 the mother consented to participate in this study, she was then referred to the research team who  
8 ensured that all eligibility criteria were met. Written informed consent was obtained from each  
9 study participant at that time.  
10  
11  
12  
13  
14  
15  
16  
17  
18  
19  
20  
21

## 22 **Data Collection**

23  
24 Quantitative: Standardized questionnaires will be completed by all study participants at three  
25 time-periods: (T1) 24-hours prior to attending the retreat, (T2) 24-hours after attending the  
26 retreat, and (T3) three months post-retreat. At each time point, the questionnaires will be  
27 completed by participants online through REDCap.[29] Paper copies can be mailed to  
28 participants upon request. The three time points will allow for the comparison of outcomes  
29 assessed by pre- and post-intervention measures. The following quantitative measures will be  
30 used in this study:  
31  
32  
33  
34  
35  
36  
37  
38  
39

- 40 (1) *Coping Health Inventory for Parents* is a 45-item scale measuring the demands  
41 experienced by parents/caregivers of a child with a chronic health condition.[30] The  
42 scale evaluates family integration and cooperation, maintenance of social support, self-  
43 esteem and psychological stability, and comprehension of the child's medical situation.  
44 Reliability has been previously established for this measure.[31]  
45  
46  
47  
48  
49  
50  
51 (2) *Five Facet Mindfulness Questionnaire* is a 39-item scale measuring one's propensity to  
52 be mindful in their daily life (i.e., observing, describing, acting with awareness, non-  
53  
54  
55  
56  
57  
58  
59  
60

1  
2  
3 judging of inner experience, and non-reactivity to inner experience).[32] Construct  
4  
5 validity has been previously established as well as its use in assessing the utilization of  
6  
7 mindfulness skills.[33]  
8  
9

10 (3) *Pediatric Quality of Life (PedsQL™) Family Impact Module* is a 36-item scale measuring  
11  
12 the impact of chronic health conditions of children on parents through eight subscales:  
13  
14 physical functioning; emotional functioning; social functioning; cognitive functioning;  
15  
16 communication; worry; daily activities; and family relationships. The PedsQL™ Family  
17  
18 Impact Module is a widely used measure for the evaluation of parental quality of life.[34]  
19  
20 Internal consistency and reliability have been previously established.[34]  
21  
22

23  
24 (4) *Distress Tolerance Scale* is a 14-item scale measuring distress tolerance across three  
25  
26 domains: tolerance of distress, appraisal of being distressed, and emotional  
27  
28 regulation.[35] Construct validity of this measure has been previously established.[35]  
29  
30

31 (5) *Multidimensional Scale of Perceived Social Support* has 12-items and measures  
32  
33 perceived social support across three groups: family, friends and a significant other.[36]  
34  
35 Validity and reliability have been previously demonstrated for this instrument.[36]  
36  
37

38  
39 Demographic and medical forms will be administered to all participants to collect  
40  
41 maternal information (e.g., age, race, ethnicity, number of children, annual household income,  
42  
43 highest level of education etc.) and child information (e.g., date of transplant, underlying  
44  
45 diagnosis, age at time of transplant, and co-morbidities etc.). These forms will be completed by  
46  
47 participants using REDCap.[29] Paper copies will be made available upon request.  
48  
49  
50

51 Qualitative: Qualitative data will be collected at (T2) on the last day of the retreat intervention  
52  
53 and (T3) three months post-intervention. Participants will be randomized into two groups of ten  
54  
55  
56  
57

1  
2  
3 to participate in focus groups on the last day of the retreat. The focus group will be organized by  
4  
5 open-ended questions and probes facilitated by members of the research team with extensive  
6  
7 experience in qualitative methodology. A second researcher will be present to observe each  
8  
9 group and document topics and concepts discussed by participants. Both focus group discussions  
10  
11 will be audio-recorded and transcribed verbatim. A subsequent semi-structured telephone  
12  
13 interview will be completed individually with each participant three months post-intervention  
14  
15 with transcription and data analysis to follow.  
16  
17  
18

### 19 **Data Analysis**

20  
21 Quantitative: Each standardized instrument will be scored individually, and group data will be  
22  
23 summarized by the calculation of means and standard deviations. T1 data will be assessed in  
24  
25 comparison to T2 and T3 data. Notable changes in scores between each time-point will be  
26  
27 descriptively analyzed. Should multiple characteristics present as significantly correlated with  
28  
29 the same outcome, repeated measures ANOVA with post-hoc analysis will be used to discern the  
30  
31 etiology of this correlation. Descriptive statistics will be used to describe and characterize the  
32  
33 sample in this pilot.  
34  
35  
36

37  
38 Qualitative: All data will be read and analyzed by multiple members of the research team.  
39  
40 Deductive thematic analysis will be used, and codes will be determined through line-by-line  
41  
42 review of the focus group discussion and individual interviews using NVivo.[37] Through this  
43  
44 review process, codes emerging repeatedly in various parts of the transcript will be noted and  
45  
46 comparatively analyzed by multiple research team members for purposes of consistency.[37]  
47  
48  
49  
50

51 Interpretation: Quantitative and qualitative data will be merged to compare both similarities and  
52  
53 differences across findings.[22] The research team will compile quantitative statistical results  
54  
55  
56  
57  
58  
59  
60

1  
2  
3 and compare findings to the qualitative themes present within the focus group and individual  
4  
5 interview data. Further analysis will consider how the two sets of data relate, diverge, and  
6  
7 interconnect to create a comprehensive understanding of the phenomena.  
8  
9

## 10 **ETHICS AND DISSEMINATION**

### 11 **Ethical Approval**

12  
13  
14  
15  
16 This research study has received approval from the SickKids Research Ethics Board  
17  
18 (Number:1000064719). All participants will provide informed consent prior to their involvement  
19  
20 in the study. This research study sample will not include participants incapable of providing  
21  
22 informed consent or any participants under the age of 18.  
23  
24  
25

### 26 **Confidentiality and Information Security**

27  
28  
29  
30 All data collected over the course of the research study, including written transcription  
31  
32 from the study's qualitative focus group and the subsequent individual telephone interviews, will  
33  
34 be de-identified to protect participant confidentiality. Anonymous study identifiers will replace  
35  
36 all identifying information present in the transcripts. All identifying information, both paper copy  
37  
38 and electronic information, will be kept confidential. Use of data over the course of the study,  
39  
40 and dissemination of results will follow standard practice guidelines as determined by the  
41  
42 SickKids Research Institute.  
43  
44  
45

### 46 **Discussion and Dissemination**

47  
48  
49  
50 When a child undergoes heart transplantation, the role of the primary caregiver is notably  
51  
52 linked to poor mental health outcomes and pervasive, illness-related parenting stress.[7] Previous  
53  
54 research has correlated mindfulness-based practices with positive psychosocial outcomes in  
55  
56  
57  
58  
59  
60



1  
2  
3 highly distressed populations,[16,38] and specifically in chronic disease populations, MBIs have  
4  
5 demonstratively reduced psychological distress and symptoms of mental illness.[14,15] Aside  
6  
7 from the benefits derived from direct participation, there is also potential for mindfulness  
8  
9 interventions to yield larger systemic rewards. Supporting mothers to improve their coping can  
10  
11 increase familial preparedness for post-transplant care management and any potential post-  
12  
13 transplant hospitalizations.[6] With the length of hospitalization contributing the largest  
14  
15 percentage of any transplant-associated costs,[6] positive caregiver coping and readiness for  
16  
17 discharge could ultimately decrease healthcare spending per transplant patient. This innovative  
18  
19 research leverages the MBR as an evidence-based intervention to engage mothers meaningfully  
20  
21 by acknowledging the complexity of their role as a caregiver and addressing the impact of  
22  
23 chronic stress and high caregiver burden.[5,7,39] While this pilot study is a preliminary step in  
24  
25 addressing a wider gap in psychosocial intervention support to caregivers, the potential benefits  
26  
27 derived are equally promising for individual patients and caregivers as well as the broader  
28  
29 healthcare system.  
30  
31  
32  
33  
34  
35

36  
37 This research is a necessary first step to advance the field of evidence-informed  
38  
39 psychosocial interventions within paediatric cardiology and results will inform future iterations  
40  
41 of the intervention across other participant groups. While caregiver experiences are unique, the  
42  
43 need for support and disease-specific community building within paediatric healthcare is  
44  
45 universal. This promising intervention will serve as a critical template for expansion across other  
46  
47 clinical caregiving populations in paediatric solid organ transplant and other chronic illness care  
48  
49 programs. Additionally, meeting the needs of all family members is vital to address family  
50  
51 functioning, coping and resilience over the course of a child's chronic illness. Findings from this  
52  
53 pilot study will provide the necessary evidence-base for future investigations examining the  
54  
55  
56  
57  
58  
59

1  
2  
3 transferability of a MBR to support the needs of other caregivers and family members affected  
4  
5 by paediatric chronic illness.  
6  
7

8  
9 The proposed research will inform a future randomized clinical trial to assess  
10  
11 implementation outcomes and intervention effectiveness of a MBR within this population. This  
12  
13 pilot study will greatly increase the breadth of knowledge about interventions that may support  
14  
15 primary caregivers of paediatric heart transplant recipients. Findings will be translated and  
16  
17 disseminated throughout cardiology and transplant communities and communicated to local,  
18  
19 provincial, and national stakeholders. In addition, findings will be presented at national  
20  
21 cardiology and transplant conferences and a manuscript will be submitted for publication in a  
22  
23 peer-reviewed journal. Dissemination of results is anticipated to begin in September 2022 and  
24  
25 will depend on the scheduled date of the retreat as permitted by provincial COVID-19 gathering  
26  
27 restrictions.  
28  
29  
30  
31  
32

33 This innovative research posits the MBR as an evidence-based intervention to effectively  
34  
35 address and support the familial impact of chronic stress and high caregiver burden for  
36  
37 mothers.[5,7,39] While this pilot study is a preliminary step in addressing a wider gap in  
38  
39 psychosocial intervention support mothers, the potential benefits derived are promising for  
40  
41 individual patients and their caregivers.  
42  
43  
44  
45

#### 46 **Abbreviations**

47  
48 MBI - Mindfulness-Based Intervention; MBR– Mindfulness-based Retreat; PTSD–Post  
49  
50 Traumatic Stress Disorder  
51

#### 52 **Competing interests**

53  
54  
55 The authors declare that they have no competing interests.  
56  
57  
58  
59  
60

## Funding

Funding for this study is provided by the SickKids Labatt Family Heart Centre Innovation Fund (Grant/Award Number: Not Applicable).

**Authors' contributions** TR, SJA, SAK, HT, MS-H, and JM participated in the study design. All these individuals are involved in the management of the study. TR drafted this protocol. All authors read, revised, and approved the final protocol.

## References

1. Murphy N, Christian B, Caplin D et al. The health of caregivers for children with disabilities: caregiver perspectives. *Child Care Health Dev* 2007;33:180-187.
2. Kennard B, Petrik K, Stewart S et al. Identifying Factors in Post-Operative Successful Adaptation to Pediatric Liver Transplantation. *Soc Work Health Care* 1991;15:19-33.
3. Cousino M, Rea K, Schumacher K et al. A systematic review of parent and family functioning in pediatric solid organ transplant populations. *Pediatr Transplant* 2017;21:e12900.
4. Soulvie, M., Desai, P., White, C. and Sullivan, B., 2012. Psychological Distress Experienced by Parents of Young Children with Congenital Heart Defects: A Comprehensive Review of Literature. *J Soc Serv Res*, 38(4), pp.484-502.
5. Green A, Meaux J, Huett A et al. Constantly Responsible, Constantly Worried, Constantly Blessed: Parenting after Pediatric Heart Transplant. *Prog Transplant* 2009;19:122-127.
6. Levy A, Sobolev B, James D et al. The Costs of Change: Direct Medical Costs of Solid Organ Transplantation in British Columbia, Canada, 1995–2003. *Value in Health* 2009;12:282-292.

- 1  
2  
3 7. Farley L, DeMaso D, D'Angelo E et al. Parenting Stress and Parental Post-traumatic  
4 Stress Disorder in Families After Pediatric Heart Transplantation. *J Heart Lung*  
5  
6 *Transplant* 2007;26:120-126.  
7  
8
- 9  
10 8. DeMaso, D., Douglas Kelley, S., Bastardi, H., O'Brien, P. and Blume, E., 2004. The  
11 longitudinal impact of psychological functioning, medical severity, and family  
12 functioning in pediatric heart transplantation. *J Heart Lung Transplant*, 23(4), pp.473-  
13 480.  
14  
15
- 16 9. Rodrigue, J., MacNaughton, K., Hoffmann, R., Graham-Pole, J., Andres, J., Novak, D.  
17 and Fennell, R., 1997. Transplantation in Children: A Longitudinal Assessment of  
18 Mothers' Stress, Coping, and Perceptions of Family Functioning. *Psychosomatics*, 38(5),  
19 pp.478-486.  
20  
21
- 22 10. Young, G., Mintzer, L., Seacord, D., Castaneda, M., Mesrkhani, V. and Stuber, M., 2003.  
23 Symptoms of Posttraumatic Stress Disorder in Parents of Transplant Recipients:  
24 Incidence, Severity, and Related Factors. *Pediatrics*, 111(6), pp. e725-e731.  
25  
26
- 27 11. Samuelson, K., Wilson, C., Padrón, E., Lee, S. and Gavron, L., 2016. Maternal PTSD and  
28 Children's Adjustment: Parenting Stress and Emotional Availability as Proposed  
29 Mediators. *J Clin Psychol*, 73(6), pp.693-706.  
30  
31
- 32 12. Simons, L., Ingerski, L. and Janicke, D., 2007. Social support, coping, and psychological  
33 distress in mothers and fathers of pediatric transplant candidates: A pilot study. *Pediatr*  
34 *Transplant*, 11(7), pp.781-787.  
35  
36
- 37 13. Jane-Llopis E, Katschnig H, McDaid D et al. Supporting decision-making processes for  
38 evidence-based mental health promotion. *Health Promot Int* 2011;26:i140-i146.  
39  
40  
41  
42  
43  
44  
45  
46  
47  
48  
49  
50  
51  
52  
53  
54  
55  
56  
57  
58  
59  
60

- 1  
2  
3 14. Fjorback L, Arendt M, Ørnbøl E et al. Mindfulness-Based Stress Reduction and  
4  
5 Mindfulness-Based Cognitive Therapy - a systematic review of randomized controlled  
6  
7 trials. *Acta Psychiatr Scand* 2011;124:102-119  
8  
9
- 10 15. Visted E, Vøllestad J, Nielsen M et al. The Impact of Group-Based Mindfulness Training  
11  
12 on Self-Reported Mindfulness: a Systematic Review and Meta-analysis. *Mindfulness*  
13  
14 2014;6:501-522.  
15  
16
- 17 16. Siegel D. Mindful awareness, mindsight, and neural integration. *The Humanistic*  
18  
19 *Psychologist* 2009;37:137-158.  
20  
21
- 22 17. Müller-Engelmann, M., Wunsch, S., Volk, M. and Steil, R., 2017. Mindfulness-Based  
23  
24 Stress Reduction (MBSR) as a Standalone Intervention for Posttraumatic Stress Disorder  
25  
26 after Mixed Traumatic Events: A Mixed-Methods Feasibility Study. *Front Psychol*, 8.  
27  
28
- 29 18. Kabat-Zinn, J., Massion, A., Kristeller, M., Gay Peterson, L., Fletcher, K., Pbert, L.,  
30  
31 Lenderking, W. and Santorelli, S., 1992. Effectiveness of a meditation-based stress  
32  
33 reduction program in the treatment of anxiety disorders. *Am J Psychiatry*, 149(7), pp.936-  
34  
35 943.  
36  
37
- 38 19. Minor, H., Carlson, L., Mackenzie, M., Zernicke, K. and Jones, L., 2006. Evaluation of a  
39  
40 Mindfulness-Based Stress Reduction (MBSR) Program for Caregivers of Children with  
41  
42 Chronic Conditions. *Soc Work Health Care*, 43(1), pp.91-109.  
43  
44
- 45 20. Ruskin D, Young M, Sugar C et al. Mindfulness and Acceptance Interventions for  
46  
47 Parents of Children and Adolescents Diagnosed with Chronic Medical Conditions: A  
48  
49 Systematic Review. *J Altern Complement Med* 2021;27:120-135.  
50  
51  
52  
53  
54  
55  
56  
57  
58  
59  
60

- 1  
2  
3 21. Duncan, L. and Bardacke, N., 2009. Mindfulness-Based Childbirth and Parenting  
4 Education: Promoting Family Mindfulness During the Perinatal Period. *J Child Fam*  
5 *Stud*, 19(2), pp.190-202.  
6  
7  
8  
9  
10 22. Creswell JW, Creswell JD. Research design: qualitative, quantitative, and mixed methods  
11 approaches. Thousand Oaks, CA: : SAGE Publications, Inc 2018.  
12  
13  
14 23. Sandelowski M. Whatever happened to qualitative description? *Research in Nursing &*  
15 *Health* 2000;23:334–40.  
16  
17  
18 24. Kitzinger, J., 1994. The methodology of Focus Groups: the importance of interaction  
19 between research participants. *Sociol Health Illn*, 16(1), pp.103-121.  
20  
21  
22 25. Krueger, R. and Casey, M., 2014. Focus groups: A Practical Guide for Applied Research.  
23 Los Angeles [etc.]: Sage.  
24  
25  
26 26. Proctor E, Silmere H, Raghavan R et al. Outcomes for Implementation Research:  
27 Conceptual Distinctions, Measurement Challenges, and Research Agenda *Adm Policy*  
28 *Ment Health* 2010;38:65-76.  
29  
30  
31 27. Kabat-Zinn J, Santorelli S, Meleo-Meyer F et al. Mindfulness-Based stress reduction  
32 authorized curriculum guide. 2017. [https://www.umassmed.edu/globalassets/center-for-](https://www.umassmed.edu/globalassets/center-for-mindfulness/documents/mbsr-curriculum-guide-2017.pdf)  
33 [mindfulness/documents/mbsr-curriculum-guide-2017.pdf](https://www.umassmed.edu/globalassets/center-for-mindfulness/documents/mbsr-curriculum-guide-2017.pdf)  
34  
35  
36 28. Erlandson D. Doing naturalistic inquiry. Newbury Park, Calif.: Sage 1993.  
37  
38  
39 29. REDCap, 2021. REDCap. [online] Project-redcap.org. Available at:  
40 [<https://www.project-redcap.org/>](https://www.project-redcap.org/) [Accessed 13 May 2021].  
41  
42  
43 30. McCubbin, H., McCubbin, M., Patterson, J., Cauble, A., Wilson, L. and Warwick, W.,  
44 1983. CHIP. Coping Health Inventory for Parents: An Assessment of Parental Coping  
45 Patterns in the Care of the Chronically Ill Child. *J Marriage Fam*, 45(2), p.359.  
46  
47  
48  
49  
50  
51  
52  
53  
54  
55  
56  
57  
58  
59  
60

- 1  
2  
3 31. Patterson, J., McCubbin, H. and Warwick, W., 1990. The impact of family functioning on  
4 health changes in children with cystic fibrosis. *Soc Sci Med*, 31(2), pp.159-164.  
5  
6  
7  
8 32. Baer, R., Smith, G., Hopkins, J., Krietemeyer, J. and Toney, L., 2006. Using Self-Report  
9 Assessment Methods to Explore Facets of Mindfulness. *Assessment*, 13(1), pp.27-45.  
10  
11  
12 33. Baer, R., Smith, G., Lykins, E., Button, D., Krietemeyer, J., Sauer, S., Walsh, E.,  
13 Duggan, D. and Williams, J., 2008. Construct Validity of the Five Facet Mindfulness  
14 Questionnaire in Meditating and Nonmeditating Samples. *Assessment*, 15(3), pp.329-342.  
15  
16  
17 34. Scarpelli, A., Paiva, S., Pordeus, I., Varni, J., Viegas, C. and Allison, P., 2008. The  
18 Pediatric Quality of Life Inventory™ (PedsQL™) family impact module: reliability and  
19 validity of the Brazilian version. *Health Qual Life Outcomes*, 6(1), p.35.  
20  
21  
22 35. Simons, J. and Gaher, R., 2005. The Distress Tolerance Scale: Development and  
23 Validation of a Self-Report Measure. *Motiv Emot*, 29(2), pp.83-102.  
24  
25  
26 36. Dahlem, N., Zimet, G. and Walker, R., 1991. The Multidimensional Scale of Perceived  
27 Social Support: A confirmation study. *J Clin Psychol*, 47(6), pp.756-761.  
28  
29  
30 37. Braun, V. and Clarke, V., 2006. Using thematic analysis in psychology. *Qual Res*  
31 *Psychol*, 3(2), pp.77-101.  
32  
33  
34 38. Cahn B, Goodman M, Peterson C et al. Yoga, Meditation and Mind-Body Health:  
35 Increased BDNF, Cortisol Awakening Response, and Altered Inflammatory Marker  
36 Expression after a 3-Month Yoga and Meditation Retreat. *Front Hum Neurosci* 2017;11.  
37  
38  
39 39. Cohn J. An Empirical Study of Parents' Reaction to the Diagnosis of Congenital Heart  
40 Disease in Infants. *Soc Work Health Care* 1996; 23:67-79.  
41  
42  
43  
44  
45  
46  
47  
48  
49  
50  
51  
52  
53  
54  
55  
56  
57  
58  
59  
60

8 Dear Mr. Adrian Aldcroft and *BMJ Open* Editorial Team,  
9

10 Please find attached a study protocol entitled “**Mindfulness-based retreat for mothers of paediatric heart**  
11 **transplant recipients: A pilot intervention study protocol**,” that we herein submit for publication in *BMJ*  
12 *Open*.  
13

14  
15 Mothers are the most common caregivers for pediatric heart transplant recipients and their ability to cope with  
16 the chronic parenting stress associated with their caregiving role is inextricably linked with patient health  
17 outcomes. Despite this correlation, the psychosocial needs of caregivers for children with chronic illness are  
18 historically underserved in pediatric healthcare.  
19

20  
21 Our research posits an innovative mindfulness-based retreat intervention that is novel to the caregiving group  
22 of mothers of heart transplant recipients. The research goals of this protocol are to assess the efficacy of the  
23 mindfulness-based weekend retreat intervention on maternal quality of life, distress tolerance, coping and  
24 perceived social support through a convergent parallel, mixed-method study design. Caregiver experiences  
25 will be dually captured through participation in a qualitative focus group and individual interview, as well as  
26 through five standardized quantitative instruments completed at three time points.  
27

28  
29 This pilot protocol will significantly increase the breadth of knowledge on interventions that effectively  
30 support primary caregivers of pediatric heart transplant recipients. Given the stature of *BMJ Open* as one of  
31 the leading communication tools for professionals in the medical field, we are confident that our research will  
32 be of interest to the readership.  
33

34  
35 We confirm that participant recruitment is ongoing. The study has undergone full internal peer review as part  
36 of the funding process and has received institutional research ethics board approval. Relevant documentation  
37 has been submitted. All authors confirm that this research protocol has not been previously published, nor is it  
38 presently under consideration for publication elsewhere. We have no conflicts of interest to disclose.  
39

40 Thank you for your time and consideration. We look forward to further correspondence with your office.  
41

42 Yours sincerely,  
43

44  
45   
46  
47  
48

49 Samantha Anthony, PhD MSW RSW  
50 Health Clinician Scientist  
51 Child Health Evaluative Sciences | The Hospital for Sick Children  
52 686 Bay Street, Toronto, Ontario M5G 0A4  
53 Telephone: 416-813-7654  
54 E-mail: [samantha.anthony@sickkids.ca](mailto:samantha.anthony@sickkids.ca)  
55  
56  
57  
58  
59  
60



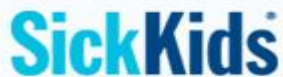

# Research Ethics Board (REB) Study Approval Letter

2019-09-17

Dr. Samantha Anthony  
Social Work

**REB number: 1000064719**

**Study Title:** Mindfulness Based Stress Reduction (MBSR) Retreat for Mothers of Pediatric Heart Transplant Recipients

**Date of Approval:** 2019-09-17

**Expiry Date:** 2020-09-17

Thank you for the application submitted on **2019-07-08**. The above referenced study was reviewed through a delegated process (not by Full Board review). Any concerns arising from this review have been documented and resolved.

The REB voted to approve this study, and your participation as Principal Investigator, as it is found to comply with relevant research ethics guidelines, as well as the Ontario Personal Health Information Protection Act (PHIPA), 2004.

The Hospital for Sick Children Research Ethics Board hereby issues approval for the above named study. This approval is effective from **2019-09-17** to **2020-09-17**. Continuation beyond that date will require further review of REB approval.

The following documents have been reviewed and are approved:

- 1. Protocol version dated August 29, 2019**  
[MBSR Protocol - 28Aug2019 clean.docx (1.0)]
- 2. Participant Consent Form version dated August 20, 2019**  
[Consent Form 20Aug2019 clean.docx (1.0)]
- 3. Verbal Introduction Script version dated**  
[Verbal study introduction script for participants delivered by member of circle of care 28Aug2019.docx (1.0)]
- 4. Demographic Form version dated August 20, 2019**  
[Demographic Form 20Aug2019 clean.docx (1.0) ]
- 5. Recruitment Email For Members of Circle of Care version dated August 28, 2019**  
[Recruitment Email from study team to members of circle of care 28Aug2019 clean.docx (1.0)]
- 6. Introduction Script for Recruitment version dated August 28, 2019**  
[Verbal study introduction script for participants delivered by member of circle of care 28Aug2019.docx (1.0)]
- 7. Interview Guide version dated August 28, 2019**  
[INTERVIEW GUIDE 28Aug2019 clean.docx (1.0)]
- 8. Focus Group Script version dated August 20, 2019**  
[FOCUS GROUP SCRIPT 20Aug2019 clean.docx (1.0)]
- 9. Exit Interview Guide version dated August 20, 2019**  
[Exit Interview Guide 22Aug2019.docx (1.0)]
- 10. Verbal Telephone Consent Script version dated August 22, 2019**  
[Verbal Consent telephone script for study team 22Aug2019.docx (1.0)]



- 1
  - 2
  - 3
  - 4
  - 5
  - 6
  - 7
  - 8
  - 9
  - 10
  - 11
  - 12
  - 13
  - 14
  - 15
  - 16
  - 17
  - 18
  - 19
  - 20
  - 21
  - 22
  - 23
  - 24
  - 25
  - 26
  - 27
  - 28
  - 29
  - 30
  - 31
  - 32
  - 33
  - 34
  - 35
  - 36
  - 37
  - 38
  - 39
  - 40
  - 41
  - 42
  - 43
  - 44
  - 45
  - 46
  - 47
  - 48
  - 49
  - 50
  - 51
  - 52
  - 53
  - 54
  - 55
  - 56
  - 57
  - 58
  - 59
  - 60
11. **Master Linking Log version dated August 20, 2019**  
[MBSR Master linking log 20Aug2019 clean.xlsx (1.0)]
12. **Follow-up Communications version dated August 22, 2019**  
[Lost to follow up email template and telephone script.docx (1.0)]
13. **Study Questionnaires version last modified August 20, 2019**  
[Validated Instruments for Participants to Complete 20Aug2019.docx (1.0)]

During the course of this investigation, any significant deviations from the approved protocol and/or unanticipated developments or significant adverse events should immediately be brought to the attention of the REB.

A handwritten signature in black ink, appearing to read "ES".

---

**Elizabeth Stephenson**  
**REB Chair**

555 University Avenue, Toronto, ON M5G 1X8  
Tel: (416) 813-8279 Fax: (416) 813-6515

The SickKids REB operates in compliance with the Tri-Council Policy Statement; ICH Guideline for Good Clinical Practice E6(R1); Ontario Personal Health Information Protection Act (2004); Part C Division 5 of the Food and Drug Regulations; Part 4 of the Natural Health Products Regulations and the Medical Devices Regulations of Health Canada. The approval and the views of the REB have been documented in writing. The REB has reviewed and approved the clinical trial protocol and informed consent form for the trial. All investigational drug trials at SickKids are conducted by qualified investigators.

Furthermore, members of the Research Ethics Board who are named as Investigators in research studies do not participate in discussions related to, nor vote on such studies when they are presented to the REB.

**GUIDED – a guideline for reporting for intervention development studies.**

## Supplementary File 1: Blank Checklist

| Item description                                                                                                                             | Explanation                                                                                                                                                                                                                                                                                                                                                                                                                                                                                                                                                                                                                                                                                                                                                                                                                                                                                                                                                                                    | Page in manuscript where item is located | Other* |
|----------------------------------------------------------------------------------------------------------------------------------------------|------------------------------------------------------------------------------------------------------------------------------------------------------------------------------------------------------------------------------------------------------------------------------------------------------------------------------------------------------------------------------------------------------------------------------------------------------------------------------------------------------------------------------------------------------------------------------------------------------------------------------------------------------------------------------------------------------------------------------------------------------------------------------------------------------------------------------------------------------------------------------------------------------------------------------------------------------------------------------------------------|------------------------------------------|--------|
| 1. Report the context for which the intervention was developed.                                                                              | Understanding the context in which an intervention was developed informs readers about the suitability and transferability of the intervention to the context in which they are considering evaluating, adapting or using the intervention. Context here can include place, organisational and wider socio-political factors that may influence the development and/or delivery of the intervention (15).                                                                                                                                                                                                                                                                                                                                                                                                                                                                                                                                                                                      | 7-9                                      |        |
| 2. Report the purpose of the intervention development process.                                                                               | Clearly describing the purpose of the intervention specifies what it sets out to achieve. The purpose may be informed by research priorities, for example those identified in systematic reviews, evidence gaps set out in practice guidance such as The National Institute for Health and Care Excellence or specific prioritisation exercises such as those undertaken with patients and practitioners through the James Lind Alliance.                                                                                                                                                                                                                                                                                                                                                                                                                                                                                                                                                      | 4-7                                      |        |
| 3. Report the target population for the intervention development process.                                                                    | The target population is the population that will potentially benefit from the intervention – this may include patients, clinicians, and/or members of the public. If the target population is clearly described then readers will be able to understand the relevance of the intervention to their own research or practice. Health inequalities, gender and ethnicity are features of the target population that may be relevant to intervention development processes.                                                                                                                                                                                                                                                                                                                                                                                                                                                                                                                      | 9-10                                     |        |
| 4. Report how any published intervention development approach contributed to the development process                                         | Many formal intervention development approaches exist and are used to guide the intervention development process (e.g. 6Squid (16) or The Person Based Approach to Intervention Development (17)). Where a formal intervention development approach is used, it is helpful to describe the process that was followed, including any deviations. More general approaches to intervention development also exist and have been categorised as follows (3):- Target Population-centred intervention development; evidence and theory-based intervention development; partnership intervention development; implementation-based intervention development; efficacy-based intervention development; step or phased-based intervention development; and intervention-specific intervention development (3). These approaches do not always have specific guidance that describe their use. Nevertheless, it is helpful to give a rich description of how any published approach was operationalised | N/A                                      |        |
| 5. Report how evidence from different sources informed the intervention development process.                                                 | Intervention development is often based on published evidence and/or primary data that has been collected to inform the intervention development process. It is useful to describe and reference all forms of evidence and data that have informed the development of the intervention because evidence bases can change rapidly, and to explain the manner in which the evidence and/or data was used. Understanding what evidence was and was not available at the time of intervention development can help readers to assess transferability to their current situation.                                                                                                                                                                                                                                                                                                                                                                                                                   | 7-9                                      |        |
| 6. Report how/if published theory informed the intervention development process.                                                             | Reporting whether and how theory informed the intervention development process aids the reader's understanding of the theoretical rationale that underpins the intervention. Though not mentioned in the e-Delphi or consensus meeting, it became increasingly apparent through the development of our guidance that this theory item could relate to either existing published theory or programme theory                                                                                                                                                                                                                                                                                                                                                                                                                                                                                                                                                                                     | 5-6                                      |        |
| 7. Report any use of components from an existing intervention in the current intervention development process.                               | Some interventions are developed with components that have been adopted from existing interventions. Clearly identifying components that have been adopted or adapted and acknowledging their original source helps the reader to understand and distinguish between the novel and adopted components of the new intervention.                                                                                                                                                                                                                                                                                                                                                                                                                                                                                                                                                                                                                                                                 | 5-6                                      |        |
| 8. Report any guiding principles, people or factors that were prioritised when making decisions during the intervention development process. | Reporting any guiding principles that governed the development of the application helps the reader to understand the authors' reasoning behind the decisions that were made. These could include the examples of particular populations who views are being considered when designing the intervention, the modality that is viewed as being most appropriate, design features considered important for the target population, or the potential for the intervention to be scaled up.                                                                                                                                                                                                                                                                                                                                                                                                                                                                                                          | 8                                        |        |

| Item description                                                                                                      | Explanation                                                                                                                                                                                                                                                                                                                                                                                                                                                                                                                                                                                                                                                                                                                                                                                                                                 | Page in manuscript where item is located | Other* |
|-----------------------------------------------------------------------------------------------------------------------|---------------------------------------------------------------------------------------------------------------------------------------------------------------------------------------------------------------------------------------------------------------------------------------------------------------------------------------------------------------------------------------------------------------------------------------------------------------------------------------------------------------------------------------------------------------------------------------------------------------------------------------------------------------------------------------------------------------------------------------------------------------------------------------------------------------------------------------------|------------------------------------------|--------|
| 9. Report how stakeholders contributed to the intervention development process.                                       | Potential stakeholders can include patient and community representatives, local and national policy makers, health care providers and those paying for or commissioning health care. Each of these groups may influence the intervention development process in different ways. Specifying how differing groups of stakeholders contributed to the intervention development process helps the reader to understand how stakeholders were involved and the degree of influence they had on the overall process. Further detail on how to integrate stakeholder contributions within intervention reporting are available (19).                                                                                                                                                                                                               | 8-9                                      |        |
| 10. Report how the intervention changed in content and format from the start of the intervention development process. | Intervention development is frequently an iterative process. The conclusion of the initial phase of intervention development does not necessarily mean that all uncertainties have been addressed. It is helpful to list remaining uncertainties such as the intervention intensity, mode of delivery, materials, procedures, or type of location that the intervention is most suitable for. This can guide other researchers to potential future areas of research and practitioners about uncertainties relevant to their healthcare context.                                                                                                                                                                                                                                                                                            | N/A                                      |        |
| 11. Report any changes to interventions required or likely to be required for subgroups.                              | Specifying any changes that the intervention development team perceive are required for the intervention to be delivered or tailored to specific sub groups enables readers to understand the applicability of the intervention to their target population or context. These changes could include changes to personnel delivering the intervention, to the content of the intervention, or to the mode of delivery of the intervention.                                                                                                                                                                                                                                                                                                                                                                                                    | N/A                                      |        |
| 12. Report important uncertainties at the end of the intervention development process.                                | Intervention development is frequently an iterative process. The conclusion of the initial phase of intervention development does not necessarily mean that all uncertainties have been addressed. It is helpful to list remaining uncertainties such as the intervention intensity, mode of delivery, materials, procedures, or type of location that the intervention is most suitable for. This can guide other researchers to potential future areas of research and practitioners about uncertainties relevant to their healthcare context.                                                                                                                                                                                                                                                                                            | N/A                                      |        |
| 13. Follow TIDieR guidance when describing the developed intervention.                                                | Interventions have been poorly reported for a number of years. In response to this, internationally recognized guidance has been published to support the high quality reporting of health care interventions <sup>5</sup> and public health interventions <sup>14</sup> . This guidance should therefore be followed when describing a developed intervention.                                                                                                                                                                                                                                                                                                                                                                                                                                                                             | N/A                                      |        |
| 14. Report the intervention development process in an open access format.                                             | Unless reports of intervention development are available people considering using an intervention cannot understand the process that was undertaken and make a judgement about its appropriateness to their context. It also limits cumulative learning about intervention development methodology and observed consequences at later evaluation, translation and implementation stages. Reporting intervention development in an open access (Gold or Green) publishing format increases the accessibility and visibility of intervention development research and makes it more likely to be read and used. Potential platforms for open access publication of intervention development include open access journal publications, freely accessible funder reports or a study web-page that details the intervention development process. | N/A                                      |        |

\*e.g. if item is reported elsewhere, then the location of this information can be stated here.

# BMJ Open

## Mindfulness-based retreat for mothers of paediatric heart transplant recipients: protocol for a pilot intervention study

|                                 |                                                                                                                                                                                                                                                                                                                                                                                                                                                                                                                                 |
|---------------------------------|---------------------------------------------------------------------------------------------------------------------------------------------------------------------------------------------------------------------------------------------------------------------------------------------------------------------------------------------------------------------------------------------------------------------------------------------------------------------------------------------------------------------------------|
| Journal:                        | <i>BMJ Open</i>                                                                                                                                                                                                                                                                                                                                                                                                                                                                                                                 |
| Manuscript ID                   | bmjopen-2021-060461.R1                                                                                                                                                                                                                                                                                                                                                                                                                                                                                                          |
| Article Type:                   | Protocol                                                                                                                                                                                                                                                                                                                                                                                                                                                                                                                        |
| Date Submitted by the Author:   | 25-May-2022                                                                                                                                                                                                                                                                                                                                                                                                                                                                                                                     |
| Complete List of Authors:       | Robertson, Taylor; The Hospital for Sick Children, Social Work<br>Ahola Kohut, Sara; Hospital for Sick Children, Department of Gastroenterology, Hepatology and Nutrition; University of Toronto, Psychiatry<br>Telfer, Heather; SickKids, Social Work; SickKids, Transplant and Regenerative Medicine Centre<br>Seifert-Hansen, Mirna; SickKids, Transplant and Regenerative Medicine Centre<br>Mitchell, Joanna; Canadian Donation and Transplantation Research Program<br>Anthony, Samantha; The Hospital for Sick Children, |
| <b>Primary Subject Heading</b>: | Mental health                                                                                                                                                                                                                                                                                                                                                                                                                                                                                                                   |
| Secondary Subject Heading:      | Qualitative research, Paediatrics                                                                                                                                                                                                                                                                                                                                                                                                                                                                                               |
| Keywords:                       | Quality in health care < HEALTH SERVICES ADMINISTRATION & MANAGEMENT, Transplant medicine < INTERNAL MEDICINE, MENTAL HEALTH, PAEDIATRICS, Paediatric transplant surgery < PAEDIATRIC SURGERY, QUALITATIVE RESEARCH                                                                                                                                                                                                                                                                                                             |
|                                 |                                                                                                                                                                                                                                                                                                                                                                                                                                                                                                                                 |

SCHOLARONE™  
Manuscripts

1  
2  
3 **1 Mindfulness-based retreat for mothers of paediatric heart transplant recipients: protocol**  
4 **2 for a pilot intervention study**

5  
6  
7 3 Taylor Robertson<sup>1</sup>, Sara Ahola Kohut<sup>2,3,4</sup>, Heather Telfer<sup>1,5</sup>, Mirna Seifert-Hansen<sup>5</sup>, Joanna  
8 4 Mitchell<sup>6</sup>, Samantha J. Anthony<sup>1,4,5,6,7</sup>

- 9  
10 5 1. Department of Social Work, The Hospital for Sick Children, Toronto, ON, Canada  
11 6 2. Department of Psychology, The Hospital for Sick Children, Toronto, ON, Canada  
12 7 3. Department of Psychiatry, University of Toronto, ON, Canada  
13 8 4. Child Health Evaluative Sciences, Peter Gilgan Centre for Research and Learning,  
14 9 Toronto, ON, Canada  
15 10 5. Transplant and Regenerative Medicine Centre, The Hospital for Sick Children, Toronto,  
16 11 ON, Canada  
17 12 6. Canadian Donation and Transplantation Research Program, Edmonton, AB, Canada  
18 13 7. Factor-Inwentash Faculty of Social Work, University of Toronto, Toronto, ON, Canada

21  
22 **14 Correspondence to:**

23 15 Samantha J. Anthony  
24 16 The Hospital for Sick Children  
25 17 686 Bay Street, Toronto, Ontario, M5G 0A4  
26 18 E-mail: [samantha.anthony@sickkids.ca](mailto:samantha.anthony@sickkids.ca)

27 19  
28 20 Word count: 3457  
29 21  
30 22  
31 23

| Author                  | ORCID-ID            |
|-------------------------|---------------------|
| Taylor Robertson        | 0000-0002-2690-701X |
| Dr. Sara Ahola Kohut    | 0000-0003-1562-947X |
| Dr. Samantha J. Anthony | 0000-0002-1800-2333 |

## 1 **Abstract**

2 **Introduction:** Mothers are often the primary caregivers for children requiring heart  
3 transplantation. Given that a mother's ability to successfully cope with the demands of her  
4 caregiving role may be predictive of positive familial psychosocial outcomes, it is critical that  
5 maternal coping is assessed and supported in paediatric health care. Mindfulness-based programs  
6 are proposed as one intervention that may enhance quality of life, improve distress tolerance and  
7 coping, and reduce social isolation in caregiving populations. This pilot study aims to  
8 investigate: (1) the implementation success of a mindfulness-based retreat (MBR), and (2) the  
9 effectiveness of the MBR at improving quality of life, distress tolerance, coping and perceived  
10 social support for mothers of paediatric heart transplant recipients.

11 **Methods and analysis:** A convergent parallel, mixed method design is proposed for this pilot,  
12 exploratory study. Twenty mothers will participate in this pilot MBR held at a resort in Ontario,  
13 Canada. Quantitative data will be obtained using five standardized instruments completed at  
14 three timepoints: (T1) 24-hours prior to the intervention, (T2) immediately upon completion of  
15 the intervention, and (T3) three months post-intervention. Qualitative data will be collected from  
16 all participants both through semi-structured focus groups at T2 and individual telephone  
17 interviews at T3. Focus groups and individual interviews will be transcribed verbatim for  
18 thematic analysis. Quantitative and qualitative data will be merged and compared during  
19 interpretation to ensure that the intervention implementation and effectiveness of the MBR  
20 retreat are described with comprehensive accuracy. The primary outcomes will be feasibility in

1 relation to implementation effectiveness and participants' perception of social support for  
2 efficacy of the MBR intervention.

3 **Ethics and dissemination:** This study received Institutional Research Ethics Board approval  
4 from The Hospital for Sick Children (Number:1000064719). Informed consent will be obtained  
5 prior to participant enrollment. Findings will be disseminated via conference presentations and  
6 submitted for publication in a peer-reviewed journal.

7 **Keywords:** quality in health care, transplant medicine, mental health, paediatrics, paediatric  
8 transplant surgery, qualitative research

### 9 **Strengths and limitations of this study**

- 10 • Our mixed-methods study design will allow for a comprehensive understanding of the  
11 study phenomena that could not be ascertained by qualitative or quantitative methods  
12 alone.
- 13 • Patient engagement is prioritized throughout this protocol, with the inclusion of a patient  
14 partner as a member of the research team to guide decisions concerning intervention  
15 design, as well as methodological choices for outcome measures.
- 16 • The completion of quantitative outcome measures at three timepoints will allow for  
17 intervention efficacy description across five domains of functioning (i.e., quality of life,  
18 utilization of mindfulness skills, distress tolerance, coping and perceived social support).



- 1 • This pilot study is exploratory in nature and designed to assess and inform a richer  
2 understanding of the implementation outcomes of this novel mindfulness-based retreat  
3 intervention for this clinical population.
- 4 • This is a single-centre study with a proposed small sample, which may limit the  
5 generalizability of the findings.

## 6 INTRODUCTION

7 From the time of diagnosis, caring for a child with a chronic illness is often a source of  
8 persistent stress for a family system.[1-4] Within paediatric heart transplantation, recipients  
9 face life-long medical follow-up that includes regular clinic visits, frequent, often invasive,  
10 medical tests and procedures, and immunosuppressive drug therapy with many accompanying  
11 side-effects (e.g., high blood pressure, kidney dysfunction, growth delay, infection risks,  
12 possible malignancies, and cosmetic effects).[5,6,7] This strict care regimen is disruptive to a  
13 family's daily life, their self-care and sleep routine[8], and places chronic social,  
14 psychological, and financial strain on family systems.[3,7]

### 15 **Maternal caregiving impact in paediatric heart transplant**

16 Mothers are most commonly the primary caregivers for paediatric heart transplant recipients.[5]  
17 As such, mothers' quality of life is impacted more than any other family member, by the  
18 mounting demands and parenting stressors associated with a child's illness.[5] Previous  
19 research on maternal coping in paediatric heart transplantation demonstrates clinically  
20 significant levels of psychosocial risk for poor mental health outcomes in 40% of  
21 respondents.[3] Additionally, the elevated psychosocial risk and significant emotional impact of  
22 transplantation on mothers appears to be enduring,[9,10] with high levels of caregiver burden  
23 reported several years post-transplantation.[9] Recent studies have cited the experience of

1  
2  
3 1 paediatric transplantation as an ongoing source of trauma for parents.[7,11] In a study on  
4  
5 2 parents of heart transplant recipients, (75% of which were mothers), 19% of participants were  
6  
7 3 found to meet the Diagnostic and Statistical Manual – IV diagnostic criteria for post-traumatic  
8  
9 4 stress disorder (PTSD), amounting to a prevalence rate that is two and half times higher than the  
10  
11 5 general population.[7] Untreated symptoms of PTSD are commonly felt within the wider family  
12  
13 6 system as they directly impact parenting capacity, and consequently, child health and  
14  
15 7 development, well-being, and adjustment.[12,13]  
16  
17  
18

19 8 Increased clinical attention and accessible interventions to support the emotional coping  
20  
21 9 and well-being of mothers may be efficacious to increase maternal coping and instrumental to  
22  
23 10 support paediatric heart transplant recipients' health and well-being. The psychosocial needs of  
24  
25 11 mothers of children with chronic illness are consistently underserved across healthcare  
26  
27 12 settings.[1] Evidence-based interventions to support caregivers in paediatric healthcare are  
28  
29 13 scarce and not prioritized,[14] and existing interventions (e.g., weekly support groups and  
30  
31 14 individual counseling) are time-consuming which parents have cited as their primary barrier to  
32  
33 15 participation in such health interventions.[1] To our knowledge this pilot study will be the first  
34  
35 16 of its kind to specifically target the psychosocial needs of mothers of paediatric heart transplant  
36  
37 17 recipients through an retreat-based mindfulness intervention.  
38  
39  
40  
41

## 42 18 **Mindfulness-based interventions**

43  
44 19 There is empirical evidence that mindfulness-based interventions (MBIs) significantly reduce  
45  
46 20 psychological distress, anxiety, and depressive symptoms, and improve physical and mental  
47  
48 21 health across many populations.[15,16] Mindfulness-Based Stress Reduction is currently the  
49  
50 22 most widely recognized and utilized MBI for the treatment of PTSD and general stress  
51  
52 23 management.[17-19] MBIs more broadly have been shown to improve mental and physical  
53  
54  
55  
56  
57  
58  
59  
60

1 health in populations of caregivers for children with chronic illnesses.[20,21] MBIs are  
2 structured programs that incorporate tenets of mindful meditation and assume that the  
3 cultivation of compassionate and non-judgmental awareness will lead to a reduction in stress,  
4 suffering and symptoms of mental illness.[17-19] In MBIs, participants are guided through  
5 exercises that develop mindfulness skills through formal practice.[15,16] These supported  
6 opportunities to build capacity practicing mindfulness skills increase the likelihood for post-  
7 intervention use of these skills as reliable coping tools to minimize distress in everyday  
8 life.[15,16] This exploratory study proposes a novel, two-day mindfulness-based weekend  
9 retreat adapted for mothers of paediatric heart transplant recipients. It is recognized that an  
10 increased level of social support is derived from the shared experience of MBIs when offered  
11 in a retreat format.[15,20] This may provide benefit to the target population of this study as  
12 high prevalence of social isolation has been identified amongst mothers of heart transplant  
13 recipients, as well as their shared interest to connect with other mothers in similar positions.[5]  
14 MBIs facilitated through a mindfulness-based weekend retreat (MBR) increase the opportunity  
15 for social connection amongst participants because of environmental facilitators such as shared  
16 accommodations, meal times and free time. The remote location while attending the retreat is  
17 essential to provide mothers some space from their caregiving demands at home to focus both  
18 on their own needs and on the mindfulness curriculum. The shared physical space while at the  
19 retreat is intentional to increase community amongst participants over the two-day retreat.

20 Mindfulness is ideally suited for this population to address the inherent stress they  
21 experience through their caregiving roles,[7] and group mindfulness practice has the ability to  
22 catalyze community building that is sustained beyond a research setting.[22] Given the  
23 applicability of a MBR to meet the needs of mothers of paediatric heart transplant recipients it

1 is proposed within this pilot study as an intervention with potential to enhance maternal well-  
2 being through the development of coping skills, social connectedness, and psychological  
3 health.[5,15,17,20,21]

#### 4 **Study aims**

5 To investigate the feasibility and efficacy of this intervention, the research objectives of this pilot  
6 study are to: (1) examine implementation outcomes (*i.e., appropriateness, acceptability,*  
7 *adoption, feasibility, fidelity*)[23] of the MBR, and (2) assess the efficacy of the MBR on  
8 maternal quality of life, distress tolerance, coping and perceived social support. The primary  
9 outcomes will be feasibility in relation to implementation effectiveness and participants'  
10 perception of social support for efficacy of the MBR intervention.

## 12 **METHODS AND ANALYSIS**

### 13 **Study design**

14 A convergent parallel, mixed method design was chosen for this pilot study wherein quantitative  
15 and qualitative data will be collected simultaneously and analyzed independently, with results  
16 merged during the final interpretative phase to address the study's overall purpose.[23] This  
17 mixed methods design will allow for a comprehensive understanding of the study phenomena by  
18 incorporating both qualitative description methods to gather a rich account of participant  
19 experiences as well as quantitative measures to document the potential changes in participant  
20 coping styles, distress tolerance, perceived quality of life and social support.[24] The participant  
21 sample size will be equal across both quantitative and qualitative arms of data collection.

1  
2  
3 1 Qualitative research is highly valuable in this area because of the subjective impact of a  
4  
5 2 child's illness on a family, and the individualized nature of each mother's parenting experience  
6  
7 3 through transplantation. Qualitative data will be gathered through participation in a focus group  
8  
9 4 on the final day of the retreat and an individual interview three months post-retreat. Focus groups  
10  
11 5 are an efficient and effective method of qualitative data collection to yield anecdotal information  
12  
13 6 about personal experiences and perceptions.[25,26] Group dialogue with mothers about their  
14  
15 7 experiences of the retreat will offer a reflective opportunity to gather participant insights and to  
16  
17 8 address implementation outcomes (*i.e., appropriateness, acceptability, adoption, feasibility,*  
18  
19 9 *fidelity*)[27] of this intervention for this clinical population. Fidelity of this intervention will be  
20  
21 10 assessed through the components of treatment fidelity (facilitator factors include design, training,  
22  
23 11 and delivery and participant factors include receipt and enactment) put forth by The Treatment  
24  
25 12 Fidelity Workgroup of the National Institutes of Health Behavior Change Consortium.[28] A  
26  
27 13 focus group fits well with the group model of this retreat and is an opportune and feasible way to  
28  
29 14 collect qualitative data from this particular sample, given their geographic diversity. Both the  
30  
31 15 focus group and interview will gather participant feedback of parallel variables.  
32  
33  
34  
35  
36

37 16 The quantitative instruments selected (*Coping Health Inventory for Parents, Five Facet*  
38  
39 17 *Mindfulness Questionnaire, Pediatric Quality of Life (PedsQL™), Distress Tolerance Scale,*  
40  
41 18 *Multidimensional Scale of Perceived Social Support*) will capture a measurable and  
42  
43 19 generalizable assessment of maternal coping. The focus group and individual interview will  
44  
45 20 highlight detailed and individualized perspectives of the mothering experience through paediatric  
46  
47 21 heart transplantation, as well as provide insights to the participant experience of the MBR.  
48  
49 22 Integration of the qualitative and quantitative data will highlight a depth of understanding that  
50  
51 23 could not be obtained by either data separately.  
52  
53  
54  
55  
56  
57  
58  
59  
60

## 1 **Patient and public involvement**

2 Caregiver needs and perspectives have been prioritized throughout the MBR pilot study design.

3 At the project's inception, a mother of a pediatric heart transplant recipient was recruited to be a  
4 member of the research team as a patient partner (JM). Her lived caregiving experience informed  
5 many decisions concerning intervention design as well as methodological choices for outcome  
6 measures. The data collection measures identified dually prioritize the need to gather the richest  
7 possible data set, with a commitment to refrain from burdening participants with lengthy and  
8 arduous measures in consideration of their time.

## 9 **Intervention design**

10 The intervention will be a two-day retreat held over a weekend. The MBR will be held at a  
11 resort in northern Ontario, Canada and will consist of a structured schedule of mindfulness and  
12 compassion-based teaching and practices, including formal meditation, circle sharing, and  
13 deep relaxation.[29] The competencies developed in these exercises will be incorporated into  
14 all other retreat activities such as mealtimes, mindful movement (including yoga), and walking  
15 meditations. Mindfulness talks will be held on each day of the retreat, offering opportunities  
16 for participants to learn about and develop mindfulness skills. Each mindfulness talk in the  
17 retreat series will build upon the content of the previous talk, with the goal of moving  
18 participants from introspective personal mindfulness practice to interpersonal community  
19 building. Opportunities for guided circle sharing (i.e., group practice of mindfulness and

1  
2  
3  
4 1 interpersonal sharing) and deep relaxation (i.e., personal practice bringing mindful attention to  
5  
6  
7 2 the body to relieve stress) will be integrated throughout the retreat.  
8  
9

10 3 The MBR will have two primary facilitators who are both mental health professionals  
11  
12  
13 4 (social worker and psychologist) with longstanding personal mindfulness practices. In  
14  
15  
16  
17 5 addition, both facilitators have completed teacher training in mindfulness (Mindful Self-  
18  
19  
20 6 Compassion and Mindfulness-Based Cognitive Therapy), as well as certificates in both  
21  
22  
23 7 Foundations of Applied Mindfulness Meditation and Applied Specialization in Mindfulness  
24  
25  
26  
27 8 Meditation from the University of Toronto, Canada. Lastly, both facilitators have extensive  
28  
29  
30 9 experience practicing in tertiary care hospitals adapting MBIs to support caregivers in chronic  
31  
32  
33  
34 10 disease populations. The facilitators, alongside the research team's patient partner (JM),  
35  
36  
37 11 adapted the MBR specifically to the paediatric heart transplantation context.  
38  
39

## 40 12 **Sample recruitment**

41  
42 13 A total of 20 participants will be recruited from The Hospital for Sick Children (SickKids)  
43  
44 14 Labatt Family Heart Centre who meet the following criteria: (1) a mother residing in Ontario  
45  
46  
47 15 who is the primary caregiver of a paediatric heart transplant recipient, who is (2) a minimum of  
48  
49 16 four months post-transplant. Within this study, 'mother' is defined as a female-identifying  
50  
51  
52 17 caregiver to a paediatric heart transplant recipient. Participants are not required to be biologically  
53  
54 18 related to the heart transplant recipient but must be the primary female-identifying caregiver and  
55  
56  
57  
58  
59  
60

1 share residence with the child. Purposive sampling will be used to obtain a sample with  
2 maximum variation.[30] Purposive sampling will ensure demographic variation amongst  
3 participants, specifically regarding: the mother's age, their child's age, stage of development and  
4 gender, and the family's race, ethnicity, composition, and geographic location of residence. Due  
5 to resource limitations that prohibit access to language and accessibility services, non-English  
6 speaking mothers and those with severe cognitive impairment as determined by a mental health  
7 professional will be excluded from participation in this study. Limited resources have also  
8 resulted in the restriction for participation in this study to Ontario residents only.

9 Participant recruitment began in January 2020 and is ongoing. The retreat will be hosted  
10 when it is safe to do so according to local COVID-19 public health guidelines. Participant  
11 recruitment has involved social work and nursing staff from the Heart Transplant Program at the  
12 SickKids Labatt Family Heart Centre, who each received a study description from the research  
13 team and were asked to select and refer mothers for eligibility review. If the mother consented to  
14 participate in this study, she was then referred to the research team who ensured that all  
15 eligibility criteria were met. Written informed consent was obtained from each study participant  
16 at that time.

### 17 **Sample size**

18 A sample size of 20 participants is adequate to obtain data saturation in qualitative studies[31,32]  
19 and aligns with the recommended class size for traditional MBSR teaching which informed the  
20 overall intervention design.[29] This sample size is also intentional to facilitate social connection  
21 within the participant group and to allow for richer discussion within mindfulness practices, such  
22 as circle sharing.[29] Mixed- method mindfulness research predominantly describes a sample  
23 size ranging from 10-20 participants for optimal intervention delivery.[31]



## 1 **Data collection**

2 Quantitative: Standardized questionnaires will be completed by all study participants at three  
3 time-periods: (T1) 24-hours prior to attending the retreat, (T2) 24-hours after attending the  
4 retreat, and (T3) three months post-retreat. At each timepoint, the questionnaires will be  
5 completed by participants online through REDCap.[33] Paper copies can be mailed to  
6 participants upon request. The three timepoints will allow for the comparison of outcomes  
7 assessed by pre- and post-intervention measures. The following quantitative measures will be  
8 used in this study:

- 9 (1) *Coping Health Inventory for Parents* is a 45-item scale measuring the demands  
10 experienced by parents/caregivers of a child with a chronic health condition.[34] The  
11 scale evaluates family integration and cooperation, maintenance of social support, self-  
12 esteem and psychological stability, and comprehension of the child's medical situation.  
13 Reliability has been previously established for this measure.[35]
- 14 (2) *Five Facet Mindfulness Questionnaire* is a 39-item scale measuring one's propensity to  
15 be mindful in their daily life (i.e., observing, describing, acting with awareness, non-  
16 judging of inner experience, and non-reactivity to inner experience).[36] Construct  
17 validity has been previously established as well as its use in assessing the utilization of  
18 mindfulness skills.[37]
- 19 (3) *Pediatric Quality of Life (PedsQL™) Family Impact Module* is a 36-item scale measuring  
20 the impact of chronic health conditions of children on parents through eight subscales:  
21 physical functioning; emotional functioning; social functioning; cognitive functioning;  
22 communication; worry; daily activities; and family relationships. The PedsQL™ Family

1 Impact Module is a widely used measure for the evaluation of parental quality of life.[38]

2 Internal consistency and reliability have been previously established.[38]

3 (4) *Distress Tolerance Scale* is a 14-item scale measuring distress tolerance across three

4 domains: tolerance of distress, appraisal of being distressed, and emotional

5 regulation.[39] Construct validity of this measure has been previously established.[39]

6 (5) *Multidimensional Scale of Perceived Social Support* has 12-items and measures

7 perceived social support across three groups: family, friends and a significant other.[40]

8 Validity and reliability have been previously demonstrated for this instrument.[40]

9 Demographic and medical forms will be administered to all participants to collect

10 maternal information (e.g., age, race, ethnicity, number of children, annual household income,

11 highest level of education etc.) and child information (e.g., date of transplant, underlying

12 diagnosis, age at time of transplant, and co-morbidities etc.). These forms will be completed by

13 participants using REDCap.[33] Paper copies will be made available upon request.

14 Qualitative: Qualitative data will be collected at (T2) on the last day of the retreat intervention

15 and (T3) three months post-intervention. Participants will be divided into two groups of ten to

16 participate in focus groups on the last day of the retreat, again utilizing purposive selection to

17 ensure maximum variation in focus groups demographics. The focus group will be organized by

18 open-ended questions and probes facilitated by members of the research team with extensive

19 experience in qualitative methodology. Focus group guiding questions will probe several areas

20 around implementation and efficacy of the MBR intervention, including but not limited to: i)

21 decision-making around attending the retreat (e.g., hopes, expectations, worries), ii) experience

22 and acceptability of participating in the retreat (e.g., impact on domains of well-being), iii)

1 appropriateness of the retreat content (e.g., what components are useful and not useful), iv)  
2 feasibility (e.g., ease of participation), and v) post-retreat impressions (e.g., would the participant  
3 recommend the retreat to other mothers of heart transplant recipients?). While the questions are  
4 important, we plan to remain flexible in terms of probing (e.g., asking follow-up questions)  
5 based on participant answers and interactions. A second researcher will be present to observe  
6 each group and document topics and concepts discussed by participants. Both focus group  
7 discussions will be audio-recorded and transcribed verbatim. A subsequent semi-structured  
8 telephone interview will be completed individually with each participant three months post-  
9 intervention with transcription and data analysis to follow.

## 10 **Data analysis**

11 Quantitative: Each standardized instrument will be scored individually, and group data will be  
12 summarized by the calculation of means and standard deviations. T1 data will be assessed in  
13 comparison to T2 and T3 data. Notable changes in scores between each time-point will be  
14 descriptively analyzed. Should multiple characteristics present as significantly correlated with  
15 the same outcome, repeated measures ANOVA with post-hoc analysis will be used to discern the  
16 etiology of this correlation. Descriptive statistics will be used to describe and characterize the  
17 sample in this pilot.

18 Qualitative: All data will be read and analyzed by multiple members of the research team.  
19 Deductive thematic analysis will be used, and codes will be determined through line-by-line  
20 review of the focus group discussion and individual interviews using NVivo.[41] Through this  
21 review process, codes emerging repeatedly in various parts of the transcript will be noted and  
22 comparatively analyzed by multiple research team members for purposes of consistency.[41]

1  
2  
3 1 Interpretation: Quantitative and qualitative data will be merged to compare both similarities and  
4  
5 2 differences across findings.[23] The research team will compile quantitative statistical results  
6  
7 3 and compare findings to the qualitative themes present within the focus group and individual  
8  
9 4 interview data. Further analysis will consider how the two sets of data relate, diverge, and  
10  
11 5 interconnect to create a comprehensive understanding of the phenomena.  
12  
13

## 14 6 **ETHICS AND DISSEMINATION**

15  
16  
17  
18 7 This research study has received approval from the SickKids Research Ethics Board  
19  
20 8 (Number:1000064719). All participants will provide informed consent prior to their involvement  
21  
22 9 in the study. This research study sample will not include participants incapable of providing  
23  
24 10 informed consent or any participants under the age of 18.  
25  
26  
27

28  
29 11 The proposed research will inform a future randomized clinical trial to assess  
30  
31 12 implementation outcomes and intervention effectiveness of a MBR within this population. This  
32  
33 13 pilot study will greatly increase the breadth of knowledge about interventions that may support  
34  
35 14 primary caregivers of paediatric heart transplant recipients. Findings will be translated and  
36  
37 15 disseminated throughout cardiology and transplant communities and communicated to local,  
38  
39 16 provincial, and national stakeholders. In addition, findings will be presented at national  
40  
41 17 cardiology and transplant conferences and a manuscript will be submitted for publication in a  
42  
43 18 peer-reviewed journal. Timing for dissemination of results will depend on the scheduled date of  
44  
45 19 the retreat as permitted by provincial COVID-19 gathering restrictions.  
46  
47  
48  
49

50 20 All data collected over the course of the research study, including written transcription  
51  
52 21 from the study's qualitative focus group and the subsequent individual telephone interviews, will  
53  
54 22 be de-identified to protect participant confidentiality. Anonymous study identifiers will replace  
55  
56  
57  
58  
59  
60

1 all identifying information present in the transcripts. All identifying information, both paper copy  
2 and electronic information, will be kept confidential. Use of data over the course of the study,  
3 and dissemination of results will follow standard practice guidelines as determined by the  
4 SickKids Research Institute.

## 5 **DISCUSSION**

6 When a child undergoes heart transplantation, the role of the primary caregiver is notably linked  
7 to poor mental health outcomes and pervasive, illness-related parenting stress.[7] Previous  
8 research has correlated mindfulness-based practices with positive psychosocial outcomes in  
9 highly distressed populations,[17,42] and specifically in chronic disease populations, MBIs have  
10 demonstratively reduced psychological distress and symptoms of mental illness.[15,16] Aside  
11 from the benefits derived from direct participation, there is also potential for mindfulness  
12 interventions to yield larger systemic rewards. Supporting mothers to improve their coping can  
13 increase familial preparedness for post-transplant care management and any potential post-  
14 transplant hospitalizations.[6] With the length of hospitalization contributing the largest  
15 percentage of any transplant-associated costs,[6] positive caregiver coping and readiness for  
16 discharge could ultimately decrease healthcare spending per transplant patient. This innovative  
17 research leverages the MBR as an evidence-based intervention to engage mothers meaningfully  
18 by acknowledging the complexity of their role as a caregiver and addressing the impact of  
19 chronic stress and high caregiver burden.[5,7,43] While this pilot study is a preliminary step in  
20 addressing a wider gap in psychosocial intervention support to caregivers, the potential benefits  
21 derived are equally promising for individual patients and caregivers as well as the broader  
22 healthcare system.

1 This research is a necessary first step to advance the field of evidence-informed  
2 psychosocial interventions within paediatric cardiology and results will inform future iterations  
3 of the intervention across other participant groups. While caregiver experiences are unique, the  
4 need for support and disease-specific community building within paediatric healthcare is  
5 universal. This promising intervention will serve as a critical template for expansion across other  
6 clinical caregiving populations in paediatric solid organ transplant and other chronic illness care  
7 programs. Additionally, meeting the needs of all family members is vital to address family  
8 functioning, coping and resilience over the course of a child's chronic illness.

9 Some study limitations should be considered. This is an exploratory single-centre study  
10 with a small sample size, which could potentially limit the generalizability of the results.  
11 Exclusion of non-English speaking mothers and mothers residing outside of Ontario is another  
12 limitation of the study that was necessary for the delivery of mindfulness teachings in a group  
13 retreat-based format, but one that must be noted when considering the demographics of study  
14 participants.

## 15 **Abbreviations**

16 MBI - Mindfulness-Based Intervention; MBR– Mindfulness-based Retreat; PTSD–Post  
17 Traumatic Stress Disorder

18  
19 **Contributors** TR, SJA, SAK, HT, MS-H, and JM participated in the study design. All these  
20 individuals are involved in the management of the study. TR drafted this protocol. All authors  
21 read, revised, and approved the final protocol.

## 22 **Competing interests**

1  
2  
3 1 The authors declare that they have no competing interests.  
4

5  
6 2 **Funding**

7  
8 3 Funding for this study is provided by the SickKids Labatt Family Heart Centre Innovation Fund  
9  
10 4 (Grant/Award Number: NA).  
11  
12  
13  
14  
15  
16  
17  
18  
19  
20  
21  
22  
23  
24  
25  
26  
27  
28  
29  
30  
31  
32  
33  
34  
35  
36  
37

38 16 **References**

- 39  
40 17 1. Murphy N, Christian B, Caplin D et al. The health of caregivers for children with  
41  
42 18 disabilities: caregiver perspectives. *Child Care Health Dev* 2007;33:180-187.  
43  
44 19 2. Kennard B, Petrik K, Stewart S et al. Identifying Factors in Post-Operative Successful  
45  
46 20 Adaptation to Pediatric Liver Transplantation. *Soc Work Health Care* 1991;15:19-33.  
47  
48 21 3. Cousino M, Rea K, Schumacher K et al. A systematic review of parent and family  
49  
50 22 functioning in pediatric solid organ transplant populations. *Pediatr Transplant*  
51  
52 23 2017;21:e12900.  
53  
54  
55  
56  
57  
58  
59  
60

- 1  
2  
3 1 4. Soulvie, M., Desai, P., White, C. and Sullivan, B., 2012. Psychological Distress  
4 Experienced by Parents of Young Children with Congenital Heart Defects: A  
5  
6 2 Comprehensive Review of Literature. *J Soc Serv Res*, 38(4), pp.484-502.  
7  
8 3  
9
- 10 4 5. Green A, Meaux J, Huett A et al. Constantly Responsible, Constantly Worried,  
11  
12 5 Constantly Blessed: Parenting after Pediatric Heart Transplant. *Prog Transplant*  
13  
14 6 2009;19:122-127.  
15  
16
- 17 7 6. Levy A, Sobolev B, James D et al. The Costs of Change: Direct Medical Costs of Solid  
18  
19 8 Organ Transplantation in British Columbia, Canada, 1995–2003. *Value in Health*  
20  
21 9 2009;12:282-292.  
22  
23
- 24 10 7. Farley L, DeMaso D, D'Angelo E et al. Parenting Stress and Parental Post-traumatic  
25  
26 11 Stress Disorder in Families After Pediatric Heart Transplantation. *J Heart Lung*  
27  
28 12 *Transplant* 2007;26:120-126.  
29  
30
- 31 13 8. Keilty K, Cohen E, Spalding K et al. Sleep disturbance in family caregivers of children  
32  
33 14 who depend on medical technology. *Arch Dis Child* 2017;103:137-142.  
34
- 35 15 9. DeMaso, D., Douglas Kelley, S., Bastardi, H., O'Brien, P. and Blume, E., 2004. The  
36  
37 16 longitudinal impact of psychological functioning, medical severity, and family  
38  
39 17 functioning in pediatric heart transplantation. *J Heart Lung Transplant*, 23(4), pp.473-  
40  
41 18 480.  
42  
43
- 44 19 10. Rodrigue, J., MacNaughton, K., Hoffmann, R., Graham-Pole, J., Andres, J., Novak, D.  
45  
46 20 and Fennell, R., 1997. Transplantation in Children: A Longitudinal Assessment of  
47  
48 21 Mothers' Stress, Coping, and Perceptions of Family Functioning. *Psychosomatics*, 38(5),  
49  
50 22 pp.478-486.  
51  
52  
53  
54  
55  
56  
57  
58  
59  
60



- 1  
2  
3 1 11. Young, G., Mintzer, L., Seacord, D., Castaneda, M., Mesrkhani, V. and Stuber, M., 2003.  
4  
5 2 Symptoms of Posttraumatic Stress Disorder in Parents of Transplant Recipients:  
6  
7 3 Incidence, Severity, and Related Factors. *Pediatrics*, 111(6), pp. e725-e731.  
8  
9  
10 4 12. Samuelson, K., Wilson, C., Padrón, E., Lee, S. and Gavron, L., 2016. Maternal PTSD and  
11  
12 5 Children's Adjustment: Parenting Stress and Emotional Availability as Proposed  
13  
14 6 Mediators. *J Clin Psychol*, 73(6), pp.693-706.  
15  
16  
17 7 13. Simons, L., Ingerski, L. and Janicke, D., 2007. Social support, coping, and psychological  
18  
19 8 distress in mothers and fathers of pediatric transplant candidates: A pilot study. *Pediatr*  
20  
21 9 *Transplant*, 11(7), pp.781-787.  
22  
23  
24 10 14. Jane-Llopis E, Katschnig H, McDaid D et al. Supporting decision-making processes for  
25  
26 11 evidence-based mental health promotion. *Health Promot Int* 2011;26:i140-i146.  
27  
28  
29 12 15. Fjorback L, Arendt M, Ørnbøl E et al. Mindfulness-Based Stress Reduction and  
30  
31 13 Mindfulness-Based Cognitive Therapy - a systematic review of randomized controlled  
32  
33 14 trials. *Acta Psychiatr Scand* 2011;124:102-119  
34  
35  
36 15 16. Visted E, Vøllestad J, Nielsen M et al. The Impact of Group-Based Mindfulness Training  
37  
38 16 on Self-Reported Mindfulness: a Systematic Review and Meta-analysis. *Mindfulness*  
39  
40 17 2014;6:501-522.  
41  
42  
43 18 17. Siegel D. Mindful awareness, mindsight, and neural integration. *The Humanistic*  
44  
45 19 *Psychologist* 2009;37:137-158.  
46  
47 20 18. Müller-Engelmann, M., Wunsch, S., Volk, M. and Steil, R., 2017. Mindfulness-Based  
48  
49 21 Stress Reduction (MBSR) as a Standalone Intervention for Posttraumatic Stress Disorder  
50  
51 22 after Mixed Traumatic Events: A Mixed-Methods Feasibility Study. *Front Psychol*, 8.  
52  
53  
54  
55  
56  
57  
58  
59  
60

- 1  
2  
3 1 19. Kabat-Zinn, J., Massion, A., Kristeller, M., Gay Peterson, L., Fletcher, K., Pbert, L.,  
4  
5 2 Lenderking, W. and Santorelli, S., 1992. Effectiveness of a meditation-based stress  
6  
7 3 reduction program in the treatment of anxiety disorders. *Am J Psychiatry*, 149(7), pp.936-  
8  
9 4 943.  
10  
11  
12 5 20. Minor, H., Carlson, L., Mackenzie, M., Zernicke, K. and Jones, L., 2006. Evaluation of a  
13  
14 6 Mindfulness-Based Stress Reduction (MBSR) Program for Caregivers of Children with  
15  
16 7 Chronic Conditions. *Soc Work Health Care*, 43(1), pp.91-109.  
17  
18  
19 8 21. Ruskin D, Young M, Sugar C et al. Mindfulness and Acceptance Interventions for  
20  
21 9 Parents of Children and Adolescents Diagnosed with Chronic Medical Conditions: A  
22  
23 10 Systematic Review. *J Altern Complement Med* 2021;27:120-135.  
24  
25  
26 11 22. Duncan, L. and Bardacke, N., 2009. Mindfulness-Based Childbirth and Parenting  
27  
28 12 Education: Promoting Family Mindfulness During the Perinatal Period. *J Child Fam*  
29  
30 13 *Stud*, 19(2), pp.190-202.  
31  
32  
33 14 23. Creswell JW, Creswell JD. Research design: qualitative, quantitative, and mixed methods  
34  
35 15 approaches. Thousand Oaks, CA: : SAGE Publications, Inc 2018.  
36  
37  
38 16 24. Sandelowski M. Whatever happened to qualitative description? *Res Nurs Health*  
39  
40 17 2000;23:334–40.  
41  
42 18 25. Kitzinger, J., 1994. The methodology of Focus Groups: the importance of interaction  
43  
44 19 between research participants. *Sociol Health Illn*, 16(1), pp.103-121.  
45  
46  
47 20 26. Krueger, R. and Casey, M., 2014. Focus groups: A Practical Guide for Applied Research.  
48  
49 21 Los Angeles [etc.]: Sage.  
50  
51  
52  
53  
54  
55  
56  
57  
58  
59  
60

- 1  
2  
3 1 27. Proctor E, Silmere H, Raghavan R et al. Outcomes for Implementation Research:  
4  
5 2 Conceptual Distinctions, Measurement Challenges, and Research Agenda *Adm Policy*  
6  
7 3 *Ment Health* 2010;38:65-76.  
8  
9  
10 4 28. Kechter A, Amaro H, Black D. Reporting of Treatment Fidelity in Mindfulness-Based  
11  
12 5 Intervention Trials: A Review and New Tool Using NIH Behavior Change Consortium  
13  
14 6 Guidelines. *Mindfulness* 2018;10:215-233.  
15  
16  
17 7 29. Kabat-Zinn J, Santorelli S, Meleo-Meyer F et al. Mindfulness-Based stress reduction  
18  
19 8 authorized curriculum guide. 2017. [https://www.umassmed.edu/globalassets/center-for-](https://www.umassmed.edu/globalassets/center-for-mindfulness/documents/mbsr-curriculum-guide-2017.pdf)  
20  
21 9 [mindfulness/documents/mbsr-curriculum-guide-2017.pdf](https://www.umassmed.edu/globalassets/center-for-mindfulness/documents/mbsr-curriculum-guide-2017.pdf)  
22  
23  
24 10 30. Erlandson D. Doing naturalistic inquiry. Newbury Park, Calif.: Sage 1993.  
25  
26 11 31. Frank P, Marken M. Developments in Qualitative Mindfulness Practice Research: a Pilot  
27  
28 12 Scoping Review. *Mindfulness* 2021;13:17-36. 9  
29  
30  
31 13 32. Vasileiou K, Barnett J, Thorpe S, Young T. Characterising and justifying sample size  
32  
33 14 sufficiency in interview-based studies: systematic analysis of qualitative health research  
34  
35 15 over a 15-year period. *BMC Medical Res Methodol.* 2018;18(1):1-18.  
36  
37  
38 16 33. REDCap, 2021. REDCap. [online] Project-redcap.org. Available at:  
39  
40 17 <<https://www.project-redcap.org/>> [Accessed 13 May 2021].  
41  
42 18 34. McCubbin, H., McCubbin, M., Patterson, J., Cauble, A., Wilson, L. and Warwick, W.,  
43  
44 19 1983. CHIP. Coping Health Inventory for Parents: An Assessment of Parental Coping  
45  
46 20 Patterns in the Care of the Chronically Ill Child. *J Marriage Fam*, 45(2), p.359.  
47  
48  
49 21 35. Patterson, J., McCubbin, H. and Warwick, W., 1990. The impact of family functioning on  
50  
51 22 health changes in children with cystic fibrosis. *Soc Sci Med*, 31(2), pp.159-164.  
52  
53  
54  
55  
56  
57  
58  
59  
60

- 1  
2  
3 1 36. Baer, R., Smith, G., Hopkins, J., Krietemeyer, J. and Toney, L., 2006. Using Self-Report  
4  
5 2 Assessment Methods to Explore Facets of Mindfulness. *Assessment*, 13(1), pp.27-45.  
6  
7  
8 3 37. Baer, R., Smith, G., Lykins, E., Button, D., Krietemeyer, J., Sauer, S., Walsh, E.,  
9  
10 4 Duggan, D. and Williams, J., 2008. Construct Validity of the Five Facet Mindfulness  
11  
12 5 Questionnaire in Meditating and Nonmeditating Samples. *Assessment*, 15(3), pp.329-342.  
13  
14  
15 6 38. Scarpelli, A., Paiva, S., Pordeus, I., Varni, J., Viegas, C. and Allison, P., 2008. The  
16  
17 7 Pediatric Quality of Life Inventory™ (PedsQL™) family impact module: reliability and  
18  
19 8 validity of the Brazilian version. *Health Qual Life Outcomes*, 6(1), p.35.  
20  
21  
22 9 39. Simons, J. and Gaher, R., 2005. The Distress Tolerance Scale: Development and  
23  
24 10 Validation of a Self-Report Measure. *Motiv Emot*, 29(2), pp.83-102.  
25  
26  
27 11 40. Dahlem, N., Zimet, G. and Walker, R., 1991. The Multidimensional Scale of Perceived  
28  
29 12 Social Support: A confirmation study. *J Clin Psychol*, 47(6), pp.756-761.  
30  
31  
32 13 41. Braun, V. and Clarke, V., 2006. Using thematic analysis in psychology. *Qual Res*  
33  
34 14 *Psychol*, 3(2), pp.77-101.  
35  
36 15 42. Cahn B, Goodman M, Peterson C et al. Yoga, Meditation and Mind-Body Health:  
37  
38 16 Increased BDNF, Cortisol Awakening Response, and Altered Inflammatory Marker  
39  
40 17 Expression after a 3-Month Yoga and Meditation Retreat. *Front Hum Neurosci* 2017;11.  
41  
42  
43 18 43. Cohn J. An Empirical Study of Parents' Reaction to the Diagnosis of Congenital Heart  
44  
45 19 Disease in Infants. *Soc Work Health Care* 1996; 23:67-79.  
46  
47  
48  
49  
50  
51  
52  
53  
54  
55  
56  
57  
58  
59  
60

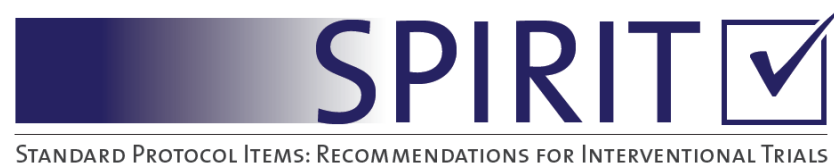

SPIRIT 2013 Checklist: Recommended items to address in a clinical trial protocol and related documents\*

| Section/item                      | Item No | Description                                                                                                                                                                                                                                                                              | Addressed on page number |
|-----------------------------------|---------|------------------------------------------------------------------------------------------------------------------------------------------------------------------------------------------------------------------------------------------------------------------------------------------|--------------------------|
| <b>Administrative information</b> |         |                                                                                                                                                                                                                                                                                          |                          |
| Title                             | 1       | Descriptive title identifying the study design, population, interventions, and, if applicable, trial acronym                                                                                                                                                                             | Page 1                   |
| Trial registration                | 2a      | Trial identifier and registry name. If not yet registered, name of intended registry                                                                                                                                                                                                     | N/A                      |
|                                   | 2b      | All items from the World Health Organization Trial Registration Data Set                                                                                                                                                                                                                 | N/A                      |
| Protocol version                  | 3       | Date and version identifier                                                                                                                                                                                                                                                              | Page 1                   |
| Funding                           | 4       | Sources and types of financial, material, and other support                                                                                                                                                                                                                              | Page 19                  |
| Roles and responsibilities        | 5a      | Names, affiliations, and roles of protocol contributors                                                                                                                                                                                                                                  | Page 1 and 19            |
|                                   | 5b      | Name and contact information for the trial sponsor                                                                                                                                                                                                                                       | N/A                      |
|                                   | 5c      | Role of study sponsor and funders, if any, in study design; collection, management, analysis, and interpretation of data; writing of the report; and the decision to submit the report for publication, including whether they will have ultimate authority over any of these activities | N/A                      |
|                                   | 5d      | Composition, roles, and responsibilities of the coordinating centre, steering committee, endpoint adjudication committee, data management team, and other individuals or groups overseeing the trial, if applicable (see Item 21a for data monitoring committee)                         | N/A                      |

|    |                                                           |     |                                                                                                               |            |
|----|-----------------------------------------------------------|-----|---------------------------------------------------------------------------------------------------------------|------------|
| 1  | <b>Introduction</b>                                       |     |                                                                                                               |            |
| 2  |                                                           |     |                                                                                                               |            |
| 3  | Background and                                            | 6a  | Description of research question and justification for undertaking the trial, including summary of relevant   | Page 5-7   |
| 4  | rationale                                                 |     | studies (published and unpublished) examining benefits and harms for each intervention                        | <hr/>      |
| 5  |                                                           |     |                                                                                                               |            |
| 6  |                                                           | 6b  | Explanation for choice of comparators                                                                         | N/A        |
| 7  |                                                           |     |                                                                                                               | <hr/>      |
| 8  | Objectives                                                | 7   | Specific objectives or hypotheses                                                                             | Page 8     |
| 9  |                                                           |     |                                                                                                               | <hr/>      |
| 10 | Trial design                                              | 8   | Description of trial design including type of trial (eg, parallel group, crossover, factorial, single group), |            |
| 11 |                                                           |     | allocation ratio, and framework (eg, superiority, equivalence, noninferiority, exploratory)                   | Page 8-11  |
| 12 |                                                           |     |                                                                                                               | <hr/>      |
| 13 |                                                           |     |                                                                                                               |            |
| 14 | <b>Methods: Participants, interventions, and outcomes</b> |     |                                                                                                               |            |
| 15 |                                                           |     |                                                                                                               |            |
| 16 | Study setting                                             | 9   | Description of study settings (eg, community clinic, academic hospital) and list of countries where data will | Page 10    |
| 17 |                                                           |     | be collected. Reference to where list of study sites can be obtained                                          | <hr/>      |
| 18 |                                                           |     |                                                                                                               |            |
| 19 | Eligibility criteria                                      | 10  | Inclusion and exclusion criteria for participants. If applicable, eligibility criteria for study centres and  | Page 11-12 |
| 20 |                                                           |     | individuals who will perform the interventions (eg, surgeons, psychotherapists)                               | <hr/>      |
| 21 |                                                           |     |                                                                                                               |            |
| 22 |                                                           |     |                                                                                                               | Page 10-11 |
| 23 | Interventions                                             | 11a | Interventions for each group with sufficient detail to allow replication, including how and when they will be | <hr/>      |
| 24 |                                                           |     | administered                                                                                                  |            |
| 25 |                                                           |     |                                                                                                               | N/A        |
| 26 |                                                           | 11b | Criteria for discontinuing or modifying allocated interventions for a given trial participant (eg, drug dose  | <hr/>      |
| 27 |                                                           |     | change in response to harms, participant request, or improving/worsening disease)                             |            |
| 28 |                                                           |     |                                                                                                               | N/A        |
| 29 |                                                           | 11c | Strategies to improve adherence to intervention protocols, and any procedures for monitoring adherence        | <hr/>      |
| 30 |                                                           |     | (eg, drug tablet return, laboratory tests)                                                                    |            |
| 31 |                                                           |     |                                                                                                               | N/A        |
| 32 |                                                           | 11d | Relevant concomitant care and interventions that are permitted or prohibited during the trial                 | <hr/>      |
| 33 |                                                           |     |                                                                                                               |            |
| 34 | Outcomes                                                  | 12  | Primary, secondary, and other outcomes, including the specific measurement variable (eg, systolic blood       | Page 8     |
| 35 |                                                           |     | pressure), analysis metric (eg, change from baseline, final value, time to event), method of aggregation (eg, | <hr/>      |
| 36 |                                                           |     | median, proportion), and time point for each outcome. Explanation of the clinical relevance of chosen         |            |
| 37 |                                                           |     | efficacy and harm outcomes is strongly recommended                                                            |            |
| 38 |                                                           |     |                                                                                                               |            |
| 39 |                                                           |     |                                                                                                               |            |
| 40 | Participant timeline                                      | 13  | Time schedule of enrolment, interventions (including any run-ins and washouts), assessments, and visits for   | Page 11-12 |
| 41 |                                                           |     | participants. A schematic diagram is highly recommended (see Figure)                                          | <hr/>      |
| 42 |                                                           |     |                                                                                                               |            |

|    |                                                                     |     |                                                                                                                                                                                                                                                                                                                                                                                                              |            |
|----|---------------------------------------------------------------------|-----|--------------------------------------------------------------------------------------------------------------------------------------------------------------------------------------------------------------------------------------------------------------------------------------------------------------------------------------------------------------------------------------------------------------|------------|
| 1  | Sample size                                                         | 14  | Estimated number of participants needed to achieve study objectives and how it was determined, including clinical and statistical assumptions supporting any sample size calculations                                                                                                                                                                                                                        | Page 11    |
| 2  |                                                                     |     |                                                                                                                                                                                                                                                                                                                                                                                                              |            |
| 3  |                                                                     |     |                                                                                                                                                                                                                                                                                                                                                                                                              |            |
| 4  | Recruitment                                                         | 15  | Strategies for achieving adequate participant enrolment to reach target sample size                                                                                                                                                                                                                                                                                                                          | N/A        |
| 5  |                                                                     |     |                                                                                                                                                                                                                                                                                                                                                                                                              |            |
| 6  |                                                                     |     |                                                                                                                                                                                                                                                                                                                                                                                                              |            |
| 7  | <b>Methods: Assignment of interventions (for controlled trials)</b> |     |                                                                                                                                                                                                                                                                                                                                                                                                              |            |
| 8  | Allocation:                                                         |     |                                                                                                                                                                                                                                                                                                                                                                                                              |            |
| 9  |                                                                     |     |                                                                                                                                                                                                                                                                                                                                                                                                              |            |
| 10 |                                                                     |     |                                                                                                                                                                                                                                                                                                                                                                                                              | N/A        |
| 11 | Sequence generation                                                 | 16a | Method of generating the allocation sequence (eg, computer-generated random numbers), and list of any factors for stratification. To reduce predictability of a random sequence, details of any planned restriction (eg, blocking) should be provided in a separate document that is unavailable to those who enrol participants or assign interventions                                                     |            |
| 12 |                                                                     |     |                                                                                                                                                                                                                                                                                                                                                                                                              |            |
| 13 |                                                                     |     |                                                                                                                                                                                                                                                                                                                                                                                                              |            |
| 14 |                                                                     |     |                                                                                                                                                                                                                                                                                                                                                                                                              |            |
| 15 |                                                                     |     |                                                                                                                                                                                                                                                                                                                                                                                                              |            |
| 16 | Allocation concealment mechanism                                    | 16b | Mechanism of implementing the allocation sequence (eg, central telephone; sequentially numbered, opaque, sealed envelopes), describing any steps to conceal the sequence until interventions are assigned                                                                                                                                                                                                    | N/A        |
| 17 |                                                                     |     |                                                                                                                                                                                                                                                                                                                                                                                                              |            |
| 18 |                                                                     |     |                                                                                                                                                                                                                                                                                                                                                                                                              |            |
| 19 |                                                                     |     |                                                                                                                                                                                                                                                                                                                                                                                                              |            |
| 20 |                                                                     |     |                                                                                                                                                                                                                                                                                                                                                                                                              |            |
| 21 | Implementation                                                      | 16c | Who will generate the allocation sequence, who will enrol participants, and who will assign participants to interventions                                                                                                                                                                                                                                                                                    | N/A        |
| 22 |                                                                     |     |                                                                                                                                                                                                                                                                                                                                                                                                              |            |
| 23 |                                                                     |     |                                                                                                                                                                                                                                                                                                                                                                                                              |            |
| 24 | Blinding (masking)                                                  | 17a | Who will be blinded after assignment to interventions (eg, trial participants, care providers, outcome assessors, data analysts), and how                                                                                                                                                                                                                                                                    | N/A        |
| 25 |                                                                     |     |                                                                                                                                                                                                                                                                                                                                                                                                              |            |
| 26 |                                                                     |     |                                                                                                                                                                                                                                                                                                                                                                                                              |            |
| 27 |                                                                     | 17b | If blinded, circumstances under which unblinding is permissible, and procedure for revealing a participant's allocated intervention during the trial                                                                                                                                                                                                                                                         | N/A        |
| 28 |                                                                     |     |                                                                                                                                                                                                                                                                                                                                                                                                              |            |
| 29 |                                                                     |     |                                                                                                                                                                                                                                                                                                                                                                                                              |            |
| 30 |                                                                     |     |                                                                                                                                                                                                                                                                                                                                                                                                              |            |
| 31 | <b>Methods: Data collection, management, and analysis</b>           |     |                                                                                                                                                                                                                                                                                                                                                                                                              |            |
| 32 |                                                                     |     |                                                                                                                                                                                                                                                                                                                                                                                                              |            |
| 33 | Data collection methods                                             | 18a | Plans for assessment and collection of outcome, baseline, and other trial data, including any related processes to promote data quality (eg, duplicate measurements, training of assessors) and a description of study instruments (eg, questionnaires, laboratory tests) along with their reliability and validity, if known. Reference to where data collection forms can be found, if not in the protocol | Page 12-15 |
| 34 |                                                                     |     |                                                                                                                                                                                                                                                                                                                                                                                                              |            |
| 35 |                                                                     |     |                                                                                                                                                                                                                                                                                                                                                                                                              |            |
| 36 |                                                                     |     |                                                                                                                                                                                                                                                                                                                                                                                                              |            |
| 37 |                                                                     |     |                                                                                                                                                                                                                                                                                                                                                                                                              |            |
| 38 |                                                                     |     |                                                                                                                                                                                                                                                                                                                                                                                                              |            |
| 39 |                                                                     | 18b | Plans to promote participant retention and complete follow-up, including list of any outcome data to be collected for participants who discontinue or deviate from intervention protocols                                                                                                                                                                                                                    | N/A        |
| 40 |                                                                     |     |                                                                                                                                                                                                                                                                                                                                                                                                              |            |
| 41 |                                                                     |     |                                                                                                                                                                                                                                                                                                                                                                                                              |            |
| 42 |                                                                     |     |                                                                                                                                                                                                                                                                                                                                                                                                              |            |
| 43 |                                                                     |     |                                                                                                                                                                                                                                                                                                                                                                                                              |            |
| 44 |                                                                     |     |                                                                                                                                                                                                                                                                                                                                                                                                              |            |
| 45 |                                                                     |     |                                                                                                                                                                                                                                                                                                                                                                                                              |            |
| 46 |                                                                     |     |                                                                                                                                                                                                                                                                                                                                                                                                              |            |

1 Data management 19 Plans for data entry, coding, security, and storage, including any related processes to promote data quality  
 2 (eg, double data entry; range checks for data values). Reference to where details of data management  
 3 procedures can be found, if not in the protocol

5 Statistical methods 20a Statistical methods for analysing primary and secondary outcomes. Reference to where other details of the  
 6 statistical analysis plan can be found, if not in the protocol

8 20b Methods for any additional analyses (eg, subgroup and adjusted analyses)

10 20c Definition of analysis population relating to protocol non-adherence (eg, as randomised analysis), and any  
 11 statistical methods to handle missing data (eg, multiple imputation)

14 **Methods: Monitoring**

16 Data monitoring 21a Composition of data monitoring committee (DMC); summary of its role and reporting structure; statement of  
 17 whether it is independent from the sponsor and competing interests; and reference to where further details  
 18 about its charter can be found, if not in the protocol. Alternatively, an explanation of why a DMC is not  
 19 needed

22 21b Description of any interim analyses and stopping guidelines, including who will have access to these interim  
 23 results and make the final decision to terminate the trial

25 Harms 22 Plans for collecting, assessing, reporting, and managing solicited and spontaneously reported adverse  
 26 events and other unintended effects of trial interventions or trial conduct

28 Auditing 23 Frequency and procedures for auditing trial conduct, if any, and whether the process will be independent  
 29 from investigators and the sponsor

32 **Ethics and dissemination**

34 Research ethics 24 Plans for seeking research ethics committee/institutional review board (REC/IRB) approval  
 35 approval

37 Protocol 25 Plans for communicating important protocol modifications (eg, changes to eligibility criteria, outcomes,  
 38 amendments analyses) to relevant parties (eg, investigators, REC/IRBs, trial participants, trial registries, journals,  
 39 regulators)



|    |                               |     |                                                                                                                                                                                                                                                                                     |            |
|----|-------------------------------|-----|-------------------------------------------------------------------------------------------------------------------------------------------------------------------------------------------------------------------------------------------------------------------------------------|------------|
| 1  | Consent or assent             | 26a | Who will obtain informed consent or assent from potential trial participants or authorised surrogates, and how (see Item 32)                                                                                                                                                        | Page 12    |
| 2  |                               |     |                                                                                                                                                                                                                                                                                     |            |
| 3  |                               |     |                                                                                                                                                                                                                                                                                     |            |
| 4  |                               | 26b | Additional consent provisions for collection and use of participant data and biological specimens in ancillary studies, if applicable                                                                                                                                               | N/A        |
| 5  |                               |     |                                                                                                                                                                                                                                                                                     |            |
| 6  |                               |     |                                                                                                                                                                                                                                                                                     |            |
| 7  | Confidentiality               | 27  | How personal information about potential and enrolled participants will be collected, shared, and maintained in order to protect confidentiality before, during, and after the trial                                                                                                | Page 16-17 |
| 8  |                               |     |                                                                                                                                                                                                                                                                                     |            |
| 9  |                               |     |                                                                                                                                                                                                                                                                                     |            |
| 10 | Declaration of interests      | 28  | Financial and other competing interests for principal investigators for the overall trial and each study site                                                                                                                                                                       | Page 19    |
| 11 |                               |     |                                                                                                                                                                                                                                                                                     |            |
| 12 |                               |     |                                                                                                                                                                                                                                                                                     |            |
| 13 | Access to data                | 29  | Statement of who will have access to the final trial dataset, and disclosure of contractual agreements that limit such access for investigators                                                                                                                                     | N/A        |
| 14 |                               |     |                                                                                                                                                                                                                                                                                     |            |
| 15 |                               |     |                                                                                                                                                                                                                                                                                     |            |
| 16 | Ancillary and post-trial care | 30  | Provisions, if any, for ancillary and post-trial care, and for compensation to those who suffer harm from trial participation                                                                                                                                                       | N/A        |
| 17 |                               |     |                                                                                                                                                                                                                                                                                     |            |
| 18 |                               |     |                                                                                                                                                                                                                                                                                     |            |
| 19 |                               |     |                                                                                                                                                                                                                                                                                     |            |
| 20 | Dissemination policy          | 31a | Plans for investigators and sponsor to communicate trial results to participants, healthcare professionals, the public, and other relevant groups (eg, via publication, reporting in results databases, or other data sharing arrangements), including any publication restrictions | Page 16    |
| 21 |                               |     |                                                                                                                                                                                                                                                                                     |            |
| 22 |                               |     |                                                                                                                                                                                                                                                                                     |            |
| 23 |                               |     |                                                                                                                                                                                                                                                                                     |            |
| 24 |                               | 31b | Authorship eligibility guidelines and any intended use of professional writers                                                                                                                                                                                                      | N/A        |
| 25 |                               |     |                                                                                                                                                                                                                                                                                     |            |
| 26 |                               | 31c | Plans, if any, for granting public access to the full protocol, participant-level dataset, and statistical code                                                                                                                                                                     | N/A        |
| 27 |                               |     |                                                                                                                                                                                                                                                                                     |            |
| 28 |                               |     |                                                                                                                                                                                                                                                                                     |            |
| 29 | <b>Appendices</b>             |     |                                                                                                                                                                                                                                                                                     |            |
| 30 |                               |     |                                                                                                                                                                                                                                                                                     |            |
| 31 | Informed consent materials    | 32  | Model consent form and other related documentation given to participants and authorised surrogates                                                                                                                                                                                  | N/A        |
| 32 |                               |     |                                                                                                                                                                                                                                                                                     |            |
| 33 |                               |     |                                                                                                                                                                                                                                                                                     |            |
| 34 | Biological specimens          | 33  | Plans for collection, laboratory evaluation, and storage of biological specimens for genetic or molecular analysis in the current trial and for future use in ancillary studies, if applicable                                                                                      | N/A        |
| 35 |                               |     |                                                                                                                                                                                                                                                                                     |            |
| 36 |                               |     |                                                                                                                                                                                                                                                                                     |            |

\*It is strongly recommended that this checklist be read in conjunction with the SPIRIT 2013 Explanation & Elaboration for important clarification on the items. Amendments to the protocol should be tracked and dated. The SPIRIT checklist is copyrighted by the SPIRIT Group under the Creative Commons [“Attribution-NonCommercial-NoDerivs 3.0 Unported”](https://creativecommons.org/licenses/by-nc-nd/3.0/) license.
